# **Evolution of Portulacineae marked by gene tree conflict and gene family expansion associated with adaptation to harsh environments**

Ning Wang<sup>1</sup>, Ya Yang<sup>2</sup>, Michael J. Moore<sup>3</sup>, Samuel F. Brockington<sup>4</sup>, Joseph F. Walker<sup>1</sup>, Joseph W Brown<sup>5</sup>, Bin Liang<sup>1</sup>, Tao Feng<sup>4</sup>, Caroline Edwards<sup>3</sup>, Jessica Mikenas<sup>3</sup>, Julia Olivieri<sup>3</sup>, Vera Hutchison<sup>3</sup>, Alfonso Timoneda<sup>4</sup>, Tommy Stoughton<sup>6</sup>, Raúl Puente<sup>7</sup>, Lucas Majure<sup>7</sup>, Urs Eggli<sup>8</sup>, and Stephen A. Smith<sup>1</sup>

<sup>1</sup>Department of Ecology & Evolutionary Biology, University of Michigan, 830 North University Avenue, Ann Arbor, MI 48109-1048, USA

<sup>2</sup>Department of Plant and Microbial Biology, University of Minnesota-Twin Cities. 1445 Gortner Avenue, St. Paul, MN 55108 USA

<sup>3</sup>Department of Biology, Oberlin College, Science Center K111, 119 Woodland St., Oberlin, Ohio 44074 USA

<sup>4</sup>Department of Plant Sciences, University of Cambridge, Cambridge CB2 3EA, United Kingdom

<sup>5</sup>Department of Animal and Plant Sciences, University of Sheffield, Western Bank, Sheffield S10 2TN, United Kingdom

<sup>6</sup>Center for the Environment, MSC 63, Plymouth State University, 17 High Street Plymouth, NH 03264 USA

<sup>7</sup>Department of Research, Conservation and Collections, Desert Botanical Garden, 1201 N. Galvin Pkwy, Phoenix, AZ 85008 USA

<sup>8</sup>Sukkulanten-Sammlung Zürich, Mythenquai 88, CH-8002 Zürich, Switzerland

Corresponding authors: Ning Wang, Email: [ningwum@umich.edu](mailto:ningwum@umich.edu)

Stephen A. Smith, E-mail: [eebsmith@umich.edu](mailto:eebsmith@umich.edu)

## Abstract:

Survival in harsh environments is associated with several adaptations in plants. Species in the Portulacineae (Caryophyllales) have adapted to some of the most extreme terrestrial conditions on Earth, including extreme heat, cold, and salinity. Here, we generated 52 new transcriptomes and combined these with 30 previously generated transcriptomes, forming a dataset containing 68 species of Portulacineae, seven from its sister clade Molluginaceae, and seven outgroups. We performed a phylotranscriptomic analysis to examine patterns of molecular evolution within the Portulacineae. Our inferred species tree topology was largely congruent with previous analyses. We also identified several nodes that were characterized by excessive gene tree conflict and examined the potential influence of outlying genes. We identified gene duplications throughout the Portulacineae, and found corroborating evidence for previously identified paleopolyploidy events along with one newly identified event associated with the family Didiereaceae. Gene family expansion within Portulacineae was associated with genes previously identified as important for survival in extreme conditions, indicating possible molecular correlates of niche changes that should be explored further. Some of these genes also showed some evidence for positive selection. The correlation between gene function and expansion suggests that gene/genome duplication have likely contributed to the extreme adaptations seen in the Portulacineae.

key words: gene tree conflict, gene duplication, molecular evolution, paleopolyploidy, Portulacineae, stress adaptation

## Introduction

Temperature and water availability are two major ecological variables that influence plant distribution and survival (e.g., Peel et al. 2007). Plants living in severe environments that are characterized by extremely low precipitation, extreme temperature ranges, intense sun and/or dry winds, often exhibit morphological, physiological, and ecological characteristics that allow them to cope with such highly variable abiotic stresses (Gibson 1996; Kreps et al. 2002). We may expect to find some signature of the transitions in the phenotypic adaptations to survive these environments within genes and genomes. While researchers have addressed these questions in several ways in different clades (e.g., Christin et al. 2007), until recently it has not been possible to obtain large scale genomic and transcriptomic data for large clades.

The Portulacineae comprises ~ 2200 species in nine families and 160 genera (Nyffeler and Eggli 2010a; Angiosperm Phylogeny Group 2016) that are inferred to have diverged from its sister group ~54 Mya (Arakaki et al. 2011). Species in this suborder are incredibly morphologically diverse, ranging from annual herbs to long-lived iconic stem succulents to trees. They also exhibit variable habitat preferences ranging from rainforests to deserts (Smith et al. 2018). While some species exhibit a worldwide distribution, the majority are restricted to seasonally dry areas of the northern and southern hemisphere, under either hot arid or cold arid conditions (Hernández-Ledesma et al. 2015). Many specialized traits such as fleshy or succulent stems, leaves, and/or underground parts, have arisen in association with the adaptation of this clade to xeric, alpine and arctic environments. Portulacineae also includes several transitions to Crassulacean acid metabolism (CAM) and C<sub>4</sub> photosynthesis that improve photosynthetic efficiency and hence minimize water loss in hot and dry environments compared to C<sub>3</sub> photosynthesis (Edwards and Walker 1983; Borland et al. 2009; Edwards and Ogburn 2012).

The Cactaceae encompasses roughly 80% of species in Portulacineae (~1850 species; Nyffeler and Eggli 2010b) including one of the most spectacular New World radiations of succulent plants (Mauseth 2006; Arakaki et al. 2011). In addition to succulent structures that enable water storage, they exhibit an array of adaptations to cope with arid and semiarid conditions. This includes spines (modified leaves) with some advantageous effects (Anderson 2001) and extensive, but relatively shallow, root systems that facilitate quick absorption of rainfall (Gibson and Nobel 1990). In addition to Cactaceae, Didiereaceae exhibit similar but less pronounced adaptations to the hot and seasonally dry environments of Madagascar (Arakaki et al. 2011). By including only 20 species, Didiereaceae have lower species diversity compared to Cactaceae, whereas they are no less interesting in their specialized adaptations, including the evolution of thorns and succulent leaves. In contrast to the

largely tropical and subtropical Cactaceae and Didiereaceae, Montiaceae has a cosmopolitan distribution with most species occurring in colder environments. Some even inhabit high alpine zones and/or the high Arctic, especially for species within the genera *Claytonia* and *Montia* (Ogburn and Edwards 2015; Stoughton et al. 2017). The repeated adaptations to harsh environments and remarkable habitat disparity within the Portulacineae suggest the potential that ancestral genomic elements may be predisposed to repeated co-option within each clade.

In the face of rapid environmental changes, understanding the capacity of plants to survive and evolve in different environments requires study of the genetic basis of adaptation to abiotic stresses (e.g., cold, hot, and dry conditions; Chaves et al. 2003; Fournier-Level et al. 2011). For example, genes involved in the abscisic acid (ABA) signaling pathway [e.g., ABRE-binding protein/ABRE-binding factors, the dehydration-responsive element binding (DREB) factors, and the NAC transcription factors (e.g., Qin et al. 2004, Nakashima et al. 2012)] have been demonstrated to function in drought, cold, and heat responses (Nakashima et al. 2014). However, plant stress responses may be complicated by multiple stresses (Nakashima et al. 2014), and so the role of genes to stress are still mostly unknown. Thus, by examining genes and genomes in plant lineages that have experienced macroevolutionary adaptations to stressful conditions we may yet gain new insights into the evolution of stress responses that may be broadly applicable to plant biology. Given their propensity for high stress environments, diverse ecophysiology, and relatively high number of species, the Portulacineae is an excellent group to explore such patterns.

Recent phylogenetic work has helped resolve relationships within the Portulacineae, although several key nodes around the early divergence of Portulacineae remain only moderately or poorly supported (Arakaki et al. 2011; Ogburn and Edwards 2015; Yang et al. 2018; Moore et al. 2017; Walker et al. 2018a). Several of these nodes may reflect rapid radiations (Arakaki et al. 2011) that deserve further examination. In addition, recent studies have inferred multiple paleopolyploidy events in Portulacineae, including one at the base of the clade (Yang et al. 2018). With increased taxon sampling, we may detect additional whole genome duplication (polyploidy) events. In this study, we analyzed 82 transcriptomes (of which 52 are newly generated) to better understand the evolutionary history of Portulacineae. By closely examining gene-tree/species-tree conflict, patterns of gene duplication and paleopolyploidy, and clade-specific evolutionary patterns of genes associated with stress-related responses, we aimed to 1) identify nodes with significant gene tree discordance and reveal the underlying mechanisms that are responsible for conflicting hypotheses; 2) confidently identify lineage-specific genome duplication events through improved taxon sampling within

Portulacineae; and 3) test whether gene/genome duplications are associated with clade-specific adaptive traits.

## Results and Discussion

### Phylogeny of Portulacineae

Our concatenated supermatrix contained 841 gene regions and had a total aligned length of 1,239,871 bp. The matrix had a gene occupancy of 95.4% and character occupancy of 84.5%. Of the ingroup taxa, only *Pereskia aculeata* had a gene occupancy less than 80%, while the majority (67 taxa) had over 90% of genes present in the final supermatrix.

Both the concatenated maximum likelihood tree (hereafter the CML tree) and the maximum quartet support species tree (MQSST) recovered the same topology with similar support values (fig. 1), all of which were largely consistent with previous estimates of the Portulacineae phylogeny. However, because bootstraps may be a poor indicator of support in large phylogenomic datasets (e.g., wrong phylogeny can be increasingly supported as more sequence data are added, Alfaro et al. 2003; Phillips et al. 2004), we also conducted gene tree conflict analyses (fig. 2A, Smith SA et al. 2015). For example, we found strong support (100% multi-locus bootstrap from ASTRAL and ML bootstrap) for the sister relationship of Molluginaceae and Portulacineae (fig. 1), consistent with several recent studies (Edwards and Ogburn 2012; Yang et al. 2015, 2018; Moore et al. 2017), but also found that most gene trees were either uninformative for this clade or conflicted with the ML result. Our analysis recovered the ACPT clade (Anacampserotaceae, Cactaceae, Portulacaceae and Talinaceae; Hershkovitz and Zimmer 1997; Applequist and Wallace 2001; Applequist et al. 2006; Nyffeler 2007; Nyffeler and Eggli 2010b; Ocampo and Columbus 2010; Arakaki et al. 2011; Moore et al. 2017), with high support across genes trees for a topology of (((A, P), C), T) (figs. 1-2). The resolution of major clades within Portulacineae generally agrees with that of Moore et al. (2017) using a targeted enrichment approach.

Our broad taxon sampling also allowed for resolution of many deeper relationships within Portulacineae families. We found support for the sister relationship of Didiereaceae subfamilies Portulacarioideae (*Ceraria* and *Portulacaria*) and Didiereoideae (Madagascar Didiereaceae; Applequist and Wallace 2003; fig. 1), and although many gene trees were uninformative at this node, the ML resolution was the dominant gene tree topology (fig. 2A). While relationships among the genera within the Didiereoideae have been difficult to resolve with targeted-gene analyses (Applequist and Wallace 2000; Nyffeler and Eggli 2010b), we recovered very strong support (100%) in gene tree analyses for a clade of (*Alluaudia*+*Alluaudiopsis*), (*Didierea*+*Decarya*). This result differs from

Bruyns et al. (2014) that found *Alluaudiopsis* to be sister to the remaining Didiereoideae.

Within Cactaceae, we recovered three major clades (*Pereskia* s.s., *Leuenbergeria*, and the core cacti, as in Edwards et al. 2005, Bárcenas et al. 2011) with strong support (> 97%, fig. 1), but with substantial gene tree discordance (see below, fig. 2A). In fact, the majority of genes (>85%) in the earliest diverging nodes within Cactaceae were either uninformative or conflicted with each other (fig. 2A). Within the core cacti, we recovered *Maihuenia* as sister to Cactoideae with strong support, and this clade as sister to Opuntioideae as found by Edwards et al. (2005) and Moore et al. (2017). Nevertheless, the position of *Maihuenia* has previously been found to be highly unstable (e.g., within Opuntioideae, Butterworth and Wallace 2005; sister to Opuntioideae, Nyffeler 2002; or sister to Opuntioideae+Cactoideae, Hernández-Hernández et al. 2014; Moore et al. 2017). Unlike other areas within the Cactaceae that have high gene tree discordance, the monophyly of Opuntioideae (e.g., Barthlott and Hunt 1993; Wallace and Dickie 2002; Griffith and Porter 2009; Hernández-Hernández et al. 2011) and Cactoideae (Nyffeler 2002; Bárcenas et al. 2011) had relatively high concordance (95-97% gene trees support these monophyletic groups; fig. 2A). The high level of discordance among gene trees within Opuntioideae likely reflects the difficulty of resolving relationships among tribes that could not be monophyletic (e.g., Cylindropuntieae, Opuntieae; Edwards et al. 2005; Bárcenas et al. 2011; Hernández-Hernández et al. 2011). However, these conflicts may also be attributed to limited taxon sampling as we only have one or two species representing each tribe (figs. 1 and 2A). The topology of the Cactoideae was largely congruent with previous studies (e.g., Butterworth et al. 2002; Nyffeler 2002; Bárcenas et al. 2011; Hernández-Hernández et al. 2011). Within Cactaceae, the resolution of the five sampled genera was strongly supported and are consistent with what was recovered by Hernández-Hernández et al. (2011) and Vázquez-Sánchez et al. (2013) using five loci. However, the core Cactoideae (sister to Cactaceae, Hernández-Hernández et al. 2011) was poorly supported (52% CML and 54.5% MQSST, fig. 1) in both species tree inferences. With limited taxon sampling, some relationships (e.g., the monophyly of the Pachycereeae) are largely consistent with previous classification (e.g., Nyffeler and Eggli 2010b), whereas others (e.g., the position of *Gymnocalycium*) are still controversial among studies (Arakaki et al. 2011; Bárcenas et al. 2011; Hernández-Hernández et al. 2014).

#### Assessing conflict on specific nodes

As genomes and transcriptomes have become increasingly available, our ability to analyze phylogenetic conflict and concordance across hundreds or thousands of genes has increased significantly. One of the major findings of these genome-scale studies is that gene tree conflicts are prevalent throughout the tree of life (e.g. Degnan and Rosenberg 2009, Jarvis et al. 2014).



Incongruence among genealogies can result from numerous processes, including incomplete lineage sorting (ILS), horizontal gene transfer (HGT), and gene duplication and loss (Maddison, 1997). Methods that explicitly model the source of discordance among multi-locus data are very important for correctly inferring the underlying species tree (Liu and Pearl 2007; Liu et al. 2008), but a close examination of gene-specific discordance is also valuable because it may reveal the underlying processes that characterize the evolutionary history of a given clade (e.g., Shen et al. 2017). Above, we discussed gene tree conflict as it pertains to support, or lack thereof, for different clades. To specifically address gene-specific support for alternative relationships, we examined individual genes and their support for nodes, focusing on phylogenetic relationships that had previously been identified to have significant conflicts. With these conflict assessments, we examined one focal node. This allowed for alternative resolutions at a node while allowing for the remainder of the tree to be optimized for the highest maximum likelihood topology. Therefore, even though two genes may support the same resolution for the node of interest, they may have completely different topologies in areas excluding this node. This focused analysis allowed us to isolate the signal at particular nodes without having to accommodate the many diverse processes that may shape conflict in other parts of the tree.

Within Portulacineae, several regions of the tree have been identified in previous studies as having significant conflict and/or low support, e.g. the early divergences of Cactaceae, the relationship among Portulacaceae, Cactaceae, and Anacampserotaceae, and the positions of Basellaceae and Didiereaceae (e.g., Moore et al. 2017, Walker et al. 2018a). For example, Portulacaceae has been recovered as sister to Anacampserotaceae (Ogburn and Edwards 2015; Walker et al. 2018a; and recovered here) and to Cactaceae (Arakaki et al. 2011; Moore et al. 2017). We examined the three topological positions among these families to determine the gene-wise pattern of support for each topology. Within the above three topological constraints, 476 (out of 841) genes supported Anacampserotaceae+Portulacaceae, 164 genes supported Cactaceae+Portulacaceae, and 201 genes supported Cactaceae+Anacampserotaceae.

Recently, studies have demonstrated that only a few genes in phylogenomic datasets can drive the resolution of nodes (e.g., Brown and Thomson 2017; Shen et al. 2017; Walker et al. 2018b). Using these node-specific analyses, we found several outlying genes (i.e., genes highly favor one topology over the other) despite high topological support as measured by bootstraps (fig. 2B). For example, one gene (cluster4488, with homology to the "ARABILLO 1-like" genes in *Beta vulgaris*) supported Cactaceae+Portulacaceae strongly over the others (>60 lnL units). Another gene (cluster7144, with homology to the "UV-B induced protein chloroplastic-like" gene in *Chenopodium quinoa*) supported

Cactaceae+Anacampserotaceae strongly ( $>100$  lnL units over the other relationships). Neither of these genes exhibited obvious alignment errors.

We conducted similar analyses for the resolution of Basellaceae and Didiereaceae and for the resolutions of the early diverging relationships within the Cactaceae. In specific, 506 genes supported (Basellaceae, (Didiereaceae+others)) and 334 genes supported Basellaceae+Didiereaceae as found by Soltis et al. (2011) and Anton et al. (2014). No significant outlying genes were observed supporting either the above topological constraints (fig. 2B). For the early diverging Cactaceae, we examined the genes that supported the grade of relationships (*Leuenbergeria*, (*Pereskia*+others)) versus *Leuenbergeria*+*Pereskia*. Overall, 472 genes supported the grade, with 368 supporting *Leuenbergeria*+*Pereskia*. We also found one gene (cluster4707, with homology to the "NF-X1-type zinc finger protein") strongly supported the grade topology ( $>110$  lnL units), without any obvious mismatching in alignment.

#### **WGD featured the evolution of Portulacineae**

Whole-genome duplications (WGD) have been recognized as having a profound influence on the evolutionary history of extant lineages, especially for plants (e.g., Cui et al. 2006; Soltis and Soltis 2009; Jiao et al. 2011; Wendel 2015; Yang et al. 2015; Smith et al. 2018). Major WGD events have been inferred within the Caryophyllales (Yang et al. 2015, 2018; Walker et al. 2017) including three within Portulacineae: in the ancestor of Portulacineae, in the ancestor of Basellaceae, and within Montiaceae. The improved taxon sampling in the current study enabled us to infer additional events of putative WGD and large-scale gene duplications (fig. 1). Specifically, large-scale gene duplications were found in the ancestor of Portulacineae (node 13), subclades of Montiaceae [along the origin of *Calyptridium* (node 17), and the sister clade of *Calandrinia* (node 19)], in the ancestor of Didiereoideae (node 27), and in the ancestor of Cactaceae, Cactoideae and Opuntioideae (nodes 35, 39 and 50).

We considered evidence for a WGD event in the ancestor of Portulacineae (Yang et al. 2015) to be a high percentage of gene duplications (13.4%) and a Ks peak ( $\sim 0.4$ -1.0) shared by all members in this clade. Our identification of putative WGD at the base of Portulacineae contrasts with the analyses of Yang et al. (2018) that found increased gene duplication (24%) in the ancestor of Portulacineae+Molluginaceae. We did not detect a similar pattern of gene duplications at this node (1%, fig. 1), confirming that the Yang et al. (2018)'s estimation could result from phylogenetic uncertainty. We found a high percentage of gene duplication for the Didiereoideae (50.1%, fig. 1) accompanied by a very recent Ks peak (between 0.05-0.10) for all the species within this clade. We also identified genome duplications within the Montiaceae. Yang et al. (2018) identified WGD in the ancestor of



*Claytonia* species. With expanded sampling, we placed this WGD event at the ancestor of *Lewisia* and *Claytonia*, as all four species in this clade exhibited Ks peak between 0.2-0.4 (supplementary figs. S2 and S3, Supplementary Material online). We also identified an elevated number of gene duplications in the two *Calyptridium* species, accompanied by a very recent Ks peak (between 0.05-0.10; fig. 1).

While we identified a high number of gene duplications at the origin of the Cactaceae, we did not infer a WGD event as we did not detect a corresponding elevated Ks peak. This finding is consistent with other recent studies (Walker et al. 2017; Yang et al. 2018). Several other nodes within the phylogeny (e.g., nodes 50 and 39) exhibited similar patterns with high numbers of duplications but no corresponding Ks peak (fig. 1). There are several complications (gene loss, gene tree conflict, life history shifts, etc.) that may obscure the detection of gene/genome duplications and further investigation with more taxa are likely to help shed light in future studies.

For identifying duplications within a single lineage, we examined Ks plots as gene tree-based methods cannot accurately infer WGD on terminal branches. Our Ks analyses inferred two additional genome duplication events occurring within single taxa: in *Basella alba* (Ks=0.45) and *Mollugo verticillata* (Ks=0.25) (supplementary fig. S2, Supplementary Material online). Both species showed higher chromosome counts relative to close allies (Yang et al. 2018). These WGD inferences are consistent with previous studies (Yang et al. 2015, 2018).

Although Ks plots have been widely applied to WGD inference, higher Ks values (e.g., >0.75) are associated with increasingly large error (Li 1997), so it is more appropriate to detect recent WGDs with Ks values less than 2 (Vanneste et al. 2013). On the other hand, peaks at smaller Ks values (e.g., < 0.25) can also be difficult to interpret due to the splice variants or other anomalies produced during transcriptomic assembly. However, in the case of slowly evolving lineages or recent duplications, only examining larger Ks can result in missing of some potential duplications. We note that this may be the case with the Didiereoideae where the Ks peak falls in a range that also may contain splice variants (i.e., Ks peak occurred < 0.1, supplementary fig. S2, Supplementary Material online).

Some studies have suggested that some WGDs may be associated with adaptations to extreme environments (e.g., Stebbins 1971; Soltis and Soltis, 2000; Brochmann et al. 2004), speciation/diversification (Stebbins 1971; Wood et al. 2009), and success at colonization of new regions (Soltis and Soltis, 2000). Smith et al. (2018), using the information regarding duplications from Yang et al. (2018), found WGDs within the Caryophyllales to be associated with shifts in climatic niche. The addition of a WGD involving the Didiereoideae support this finding. Unlike their sister clade (including *Ceraria pygmaea* and *Portulacaria afra*) that is mainly distributed in the mainland southern Africa, all species in Didiereoideae live in the ecoregion of southwest Madagascar island.

While we do not suggest that WGDs are always associated with shifts in niche or ecological setting, within the Caryophyllales, this appears to be a common pattern.

### **Lineage-specific gene expansions associated with adaptive traits**

Analyses on Gene Ontology (GO) overrepresentation were conducted on genes duplicated in nodes 15, 17, 19, 26, 27, 35, 39, 50, and 71 (fig. 1). Of genes duplicated at each clade, 30%-55% had identifiable *Arabidopsis* IDs and almost all could be mapped in PANTHER (table 1). Genes belonging to “calcium ion binding” (GO:0005509) showed significant overrepresentation at the origins of the Montiaceae (node 15; except for *Phemeranthus parviflorus*) and the Didiereoideae (node 27); genes belonging to “sulfur compound metabolic process” (GO:0006790) also exhibited significant overrepresentation at the origin of Didiereoideae; and GO overrepresentation in “Hydrolase activity, acting on ester bonds” (i.e., esterase, GO: 0016788,  $p = 0.028$ , table 2) was found at the origin of the Cactaceae (Node 35). Many of the enriched GO terms described functional classes that are involved in diverse processes, such as “calcium ion binding” linked the universal secondary messenger calcium, or “hydrolase activity” linked to ester bond chemistry. However, others may be plausibly linked to potential adaptive traits in the Portulacineae. In this regard, the expansion of genes belonging to the “sulfur compound metabolic process” (GO:0006790) are of interest because sulfur-bearing evaporate compounds (principally gypsum) are commonly found in soils in areas with low rainfall and high evaporation rates (Watson 1979), such as the hot and cold deserts in which many lineages of the Portulacineae have diversified. Researchers have also connected primary sulfur metabolism (e.g., sulfate transport in the vasculature, its assimilation in leaves, and the recycling of sulfur-containing compounds) with drought stress responses (Chan et al. 2013). Specifically, sulfate implicated in ABA-induced stomatal closure and drought-responsive metabolites have been shown to be coordinated with sulfur metabolic pathways (Chan et al. 2013). Consequently, duplication and overrepresentation of these sulfur metabolic genes could potentially be evidence of adaptation to corresponding harsh environment of hot and cold deserts (e.g., Lee et al. 2011). However, while it is tempting to speculate that these duplications have been maintained through adaptation, we recognize that such ‘duplication’ events may simply be the remnants of ancient polyploidy. In the absence of functional characterization, it is also necessary to interpret all GO term analyses with caution.

### **Gene families show broad expansions across Portulacineae**

In addition to looking at lineage-specific gene expansions, we also examined gene-family expansion without reference to a specific organismal lineage within Portulacineae. This same approach has been

instrumental in revealing gene expansion and neo-functionalization implicated in the evolution of betalains (Yang et al. 2015; Brockington et al. 2015) in Caryophyllales. Here, we explored the top 20 most expanded gene families (hereafter, called TOP20, table 3). The TOP20 included genes encoding transporters, proteases, cytoskeletal proteins and enzymes that involved in photosynthetic pathways (table 3). Within them, some are implicated in responses to drought: the gene encoding plasma membrane intrinsic protein (PIP) is an aquaporin that can regulate the transport of water flux through membranes (Vandeleur et al. 2009), heat shock proteins can prevent proteins from aggregating or being rendered nonfunctional (Kiang and Tsokos 1998), and ubiquitin can correct or degrade misfunctional proteins (Hochstrasser 2009). But perhaps the most interesting gene radiations involve those encoding Phosphoenol-pyruvate carboxylase (PEPC, Silvera et al. 2014) and NADP-dependent malic enzyme catalyses (Ferreira et al. 2003) that are key enzymes involved in CAM/C<sub>4</sub> photosynthesis (Smith and Winter 1996; Cushman 2001). The role of gene duplication in the evolution of C<sub>4</sub> photosynthesis has been contentious, and some authors have proposed that neo-functionalization of genes following duplication has not played a major role in the evolution of C<sub>4</sub> photosynthesis (Gowik and Westhoff 2011; Williams et al. 2012; van den Bergh et al. 2014). However, recent analyses provide evidences that duplication and subsequent retention of genes is associated with the evolution of C<sub>4</sub> photosynthesis (Emms et al. 2016), specifically including the NADP-dependent malic enzyme. Moreover, convergent evolution in several key amino acid residues of PEPC has been suggested to be associated with the origin of both C<sub>4</sub> and CAM (Christin et al. 2007; Christin et al. 2014). A recent study has also confirmed the occurrence of multiple rounds of duplication within the major PEPC paralog (PEPC1E1) in the ancestral Portulacineae (Christin et al. 2014). Our analyses confirm that these genes have experienced expansions within the Portulacineae, suggesting a role of this process in the evolution and adaptation in this group.

### **Targeted analyses of drought and cold associated genes**

We focused on a set of 29 functionally annotated genes known to be involved in drought and cold tolerance (table 4) as the Portulacineae have repeatedly evolved into cold and drought environments. We found almost all of these genes have experienced gene duplications including at the origin of Didiereoideae, within Montiaceae and within Cactaceae when only including nodes with SH-like support > 80 (fig. 3). Some of these lineages have experience WGDs, and so detecting gene-duplications with these genes is, perhaps, unsurprising. However, their maintenance and, in some cases, further expansion is notable. For example, we found duplications in WIN1 (SHN1) proteins in both Didiereoideae and Montiaceae (table 4). These proteins belong to the Apetala2/Ethylene Response

Factor (AP2/ERF) family and are transcription factors associated with epicuticular wax biosynthesis that increases leaf surface wax content. Overexpression of this gene can reduce direct water loss through the cuticular layer and increase plant tolerance to abiotic stresses (Sajeevan et al. 2017).

It is also noteworthy that many of duplications in these 29 focal genes occurred at the origin of Portulacineae (6 genes in table 4) or earlier (fig. 3). This suggests the possibility that some genes associated with adaptations to harsh environments diversified early in the evolution of the Portulacineae and the Caryophyllales. While different lineages may have adapted to different environments throughout the evolution of the Portulacineae, their predisposition to become adapted to these environments may be the result of the early diversification of the gene families. Additionally, genes from the same family may experience different evolutionary histories. For example, six homologs that are part of the CDPK (calmodulin-dependent protein kinase, also CPK) gene family are known to be involved in drought stress regulation (Geiger et al. 2010; Brandt et al. 2012). However, the number of duplications varied between different lineages, regardless of the similarity in habitat [four duplicated at the origin of Didiereoideae, one within Montiaceae (node 17), one at Portulacaceae, and two within the Cactaceae (nodes 35 and 57)].

These 29 targeted genes also exhibited variable lineage-specific positive selection within Portulacineae (table 4). The strongest signals of positive selection were all found in genes associated with drought and/or cold tolerance in the ABA signaling pathway (such as the NAC10/29 and WRKY33 TFs, the CDPK18 and the PP2Cs, table 4, e.g., Golldack et al. 2014; Nakashima et al. 2014; Huang et al. 2015; Li et al. 2017), a central regulator of abiotic stress resistance in plants. Interestingly, the ABI1 and PP2CA gene (Mishra et al. 2006; Merlot et al. 2001), which encode two proteins of the PP2Cs family, were among the genes with the highest number of lineages under positive selection in our tests. As negative regulators, PP2Cs can regulate numerous ABA responses, such as stomatal closure, osmotic water permeability of the plasma membrane, drought-induced resistance and rhizogenesis, seed germination and cold acclimation (Gosti et al. 1999; Merlot et al. 2001; Mishra et al. 2006). In addition to PP2C genes, the positive regulators SNF1-related protein kinase 2s (SnRK2s) are also related to the ABA signaling module (Hubbard et al. 2010). While we did not detect positive selection in the three SnRK2s genes (i.e., SnRK2.4, 2.5, 2.6, table 4), we found that they experienced ancient duplications at the origin of Portulacineae or earlier and recent duplications within Montiaceae, Didiereaceae, or Cactaceae (nodes 17, 27, 39; table 4). Positive selection and gene family expansion in some of these gene families within Cactaceae, Didieraceae, and Montiaceae suggests that these genes warrant further investigation for their potential role in the evolution of adaptations to challenging environmental conditions.

376

## 377 **Conclusion**

378 Using a transcriptomic dataset spanning across 82 species, we reconstructed a phylogeny of  
 379 Portulacineae that reveals significant underlying gene-tree/species-tree discordance. These conflicts  
 380 may arise from an array of biological sources (e.g., hybridization, ILS), and taxon sampling (even with  
 381 large number of genes, Walker et al. 2017) or sequence type may also influence species topologies in  
 382 phylogenomic analyses (Reddy et al. 2017). We examined specific nodes in detail to attempt to  
 383 document how much support there may be for particular relationships, regardless of conflict in the rest  
 384 of the tree. Our findings, along with others recently published (Smith SA et al. 2015; Brown and  
 385 Thomson 2017; Shen et al. 2017; Walker et al. 2018b), further demonstrate the need and importance to  
 386 examine gene tree relationships in detail. As genome and transcriptome studies continue to document  
 387 significant conflict, we need to consider different means of resolving relationships that can filter or  
 388 accommodate these signals. Furthermore, the conflicts within these data likely hold interesting  
 389 evolutionary questions and answers that should be analyzed in more detail.

390 With increased sampling, we also recorded new paleopolyploidy events. This contributes to a  
 391 growing body of literature that is documenting the importance of these events in the evolution of plants  
 392 (e.g., Cui et al. 2006; Smith et al. 2018). Also, as has been repeatedly demonstrated, with additional  
 393 sampling effort, we are likely to find additional duplication events. The importance of these  
 394 duplications for the evolution of individual clades needs to continue to be explored in detail. The gene  
 395 expansion and genome duplications found within the Portulacineae seem to be associated with shifts  
 396 into different environments and climates. This has been suggested by previous researchers (e.g., Smith  
 397 et al. 2018) and should be examined further across other diverse angiosperm lineages.

398 Finally, by examining gene families in detail we are able to better highlight potential molecular  
 399 evolutionary patterns associated with particular adaptations. However, the approaches explored here  
 400 and by other researchers have major limitations as they rely on annotations based on model organisms  
 401 that may be distantly related to the species of interest. While the gene may have interesting patterns, the  
 402 GO labeled to the gene may or may not carry much meaning. These genes may have different functions  
 403 in these different lineages and so the results from these analyses should not be over interpreted. Despite  
 404 these limitations, however, these analyses uncover interesting gene regions that should be explored  
 405 further, regardless of the accuracy of the label, as the patterns of selection and duplication alone  
 406 suggest their importance in the evolution of the lineage, even if not related to the particular adaptation  
 407 of interest. As angiosperms continue to be more thoroughly sequenced, we will continue to shed light  
 408 on the molecular evolutionary patterns and processes that have shaped the tree of life.

## Material and Methods

### Taxon sampling and transcriptome generation

Sixty-eight ingroup species were included in this study, representing all Portulacineae families (Anacampserotaceae, Cactaceae, Basellaceae, Didiereaceae, Montiaceae, Talinaceae, and Portulacaceae) *sensu* APG IV (Angiosperm Phylogeny Group, 2016) except for Halophytaceae (supplementary tables S1 and S2, Supplementary Material online). We also included 14 Caryophyllales species as outgroups, including seven taxa of Molluginaceae (supplementary tables S1 and S2, Supplementary Material online). Of the 82 transcriptomes included in the study, 52 were newly generated following the protocol of Yang et al. (2017), which is briefly described below (supplementary table S1, Supplementary Material online). RNA was extracted from flash-frozen young leaves and/or flower buds using either the Ambion PureLink Plant RNA Reagent (ThermoFisher Scientific Inc, Waltham, MA, USA), Aurum™ Total RNA Mini Kit, or a hot acid phenol protocol (Yang et al. 2017). Total RNA was quantified with the Agilent 2100 Bioanalyzer (Agilent Technologies, Santa Clara, CA, USA). It was then used for library preparation using either the TruSeq RNA Sample Preparation Kit v2 (Illumina, Inc., San Diego, CA) or the KAPA Stranded mRNA-Seq kit (KAPA Biosystems, Wilmington, Massachusetts, USA), and sequenced on an Illumina HiSeq platform at the University of Michigan DNA Sequencing Core (see deposited SRA, BioProject: XXX) (supplementary table S1, Supplementary Material online).

On average, ~30 million paired-end reads were generated for each transcriptome and corrected for error in Rcorrector (Song and Florea 2015). Corrected reads were assembled using Trinity v2.2.0 (Grabherr et al. 2011) after filtering of Illumina adapters (Illuminacclip 2:30:10) and low quality reads (sliding window 4:5, leading 5, trailing 5 and min length 25) using Trimmomatic v0.36 (Bolger et al. 2014). Transdecoder v2.0 (Haas et al. 2013) was then used to translate assembled transcripts with guidance of BLASTP against a concatenated proteome database including *Arabidopsis thaliana* (TAIR10) and *Beta vulgaris* (Dohm et al. 2014, RefBeet-1.2.2)(release-34 from EnsemblPlants, <http://plants.ensembl.org/info/website/ftp/index.html>). Translated amino acid sequences (PEP) and coding DNA sequences (CDS) of the newly collected samples, as well as 30 publically available datasets (Yang et al. 2015; Brockington et al. 2015; Walker et al. 2018a), were used for subsequent analyses (supplementary table S2, Supplementary Material online). Highly similar sequences were reduced using CD-HIT v4.6 for each dataset (PEP: -c 0.995 -n 5; CDS: -c 0.99 -n 10, Fu et al. 2012)



## Homology Inference

Homology inference was carried out following the pipeline of Yang and Smith (2014) with minor modifications (code available at <https://bitbucket.org/ningwang83/Portulacineae>). We describe the procedure briefly below. An all-by-all BLASTN search was conducted using CDS data (-evalue 10 - max\_target\_seqs 1000) and hits with a hit fraction > 0.49 (i.e. aligned length divided by query and by subject length both > 0.4) were clustered using MCL 14-137 (-tf 'gq(5)' -I 1.4; van Dongen 2000). We retrieved clusters including at least 26 species in Cactaceae, seven species in Montiaceae, seven species in Didiereaceae, two species in each of Portulacaceae, Talinaceae and Molluginaceae, and one species in each of Anacampserotaceae and outgroup as putative homolog groups (supplementary tables S1 and S2, Supplementary Material online). Each cluster with less than 1000 sequences was aligned by MAFFT v7 (-genafpair -maxiterate 1000; Katoh and Standley 2013) and aligned columns with more than 90% missing data were removed using Phyutility v2.2.6 (-clean 0.1; Smith and Dunn 2008). A maximum likelihood (ML) tree for each cluster was inferred in RAxML v8.1.22 (Stamatakis 2015) with the GTR+GAMMA model. The six clusters containing more than 1000 sequences were aligned with PASTA v1.6.4 (Mirarab et al. 2015), trimmed with "-clean 0.05" in Phyutility, and their ML trees were inferred in FastTree v2.1.7 (Price et al. 2009, 2010) with the GTR model.

We trimmed the resulting homolog trees by 1) removing spurious terminal branches that are longer than 0.5 (absolute cutoff), or longer than 0.4 and ten times greater than their sister taxon (relative cutoff), 2) masking both monophyletic and paraphyletic tips of the same taxon to remove possible isoforms, in-paralogs, or recent gene duplications, and 3) separating clades connected by internal branches longer than 0.6; saving those with more than five taxa into different clusters as they might represent alternate transcripts or in-paralogs. A new set of CDS sequence files were generated based on the refining trees, and the process of tree building and filtering was repeated three times.

The PyPHLAWD package (<https://github.com/FePhyFoFum/pyphlawd>) was used to add data from two additional species (*Anacampseros filamentosa* and *Basella alba*) during the third round of homolog filtering process instead of conducting the time consuming all-by-all BLASTN. Specifically, after modifying some default settings in the conf.py (i.e., "takeouttaxondups = False" to keep duplication taxa; As to BLASTN hits filtering: length\_limit = 0.6 to exclude sequences shorter than 60% of the alignments, evalue\_limit = 5 to keep hits with evalue less than 5, perc\_identity = 20 to exclude sequences with percentage of identity less than 20%.) and preparing the CDS files of the two species, the add\_internal\_seqs\_to\_clusters.py was run twice (one species at a time) to BLAST target species' CDS sequences against each homolog, and then added the hits that meet the above criteria to the existing homologs and merge them into the existing alignments using MAFFT v7. In total, we obtained

8,592 final homolog clusters for inferring orthologs and conducting gene duplication analyses and GO annotation.

## Orthology Inference and Species Tree Estimation

We used the rooted tree (RT) method in Yang and Smith (2014) to extract orthologs from homolog trees with *Beta vulgaris* as the outgroup. Sister clades with duplicate taxa were compared, and the side with less taxa was removed. This procedure was carried out from root to tips iteratively on all subclades until no duplicate taxa were present. Orthologous clades with more than 30 ingroup taxa were retained and subject to calculation of taxon occupancy statistics (supplementary fig. S1, Supplementary Material online). We further extracted orthologs with at least 76 taxa out of 82, aligned and cleaned them with MAFFT (genafpair –maxiterate 1000) and Phyutility (-clean 0.3), and inferred an ML tree for each ortholog using RAxML with GTR+GAMMA model. After removing taxa with terminal branch length longer than 0.1 and 10 times greater than sister clade from 58 orthologs, 841 orthologs include at least 77 taxa and 500 aligned DNA characters were re-aligned with PRANK v.140110 (Löytynoja and Goldman 2008) using default settings and trimmed in Phyutility (-clean 0.3). The resulting alignments were used for phylogenetic tree reconstruction.

The species tree was inferred using two methods. First, a concatenated matrix was built with the 841 orthologous genes and a ML tree was estimated by using RAxML with the GTR+GAMMA model. Node support was evaluated by 200 fast bootstrap replicates, partitioning by each gene. Second, we constructed a ML tree and 200 fast bootstrap trees for each ortholog using RAxML with GTR+GAMMA model. The MQSST tree was estimated in ASTRAL 4.10.12 (Mirarab et al. 2014) using ML trees from RAxML, with uncertainty evaluated by 200 bootstrap replicates using a two-stage multilocus bootstrap strategy (Seo 2008).

## Assessing conflicts among gene trees

Conflicts among gene trees were assessed using the 841 rooted ortholog trees mapped onto the concatenated ML tree (which has the same topology as the MQSST, see Results and Discussion). When rooting orthologous trees with Phyx (Brown et al. 2017), the outgroup was chosen based on a three-level preference (i.e., 1) using *Beta vulgaris* in priority, 2) using *Limeum aethiopicum* and/or *Stegnosperma halimifolium* if *Beta* was not present in the tree, and 3) using *Sesuvium portulacastrum*, *Delosperma echinatum*, *Anisomeria littoralis* and *Guapira obtusata* if the first three species were not present). Phyparts (Smith SA et al. 2015) was used for comparing gene trees to the inferred species tree topology, restricted to nodes with  $\geq 70\%$  bootstrap support in the gene trees. We explored conflict and

alternative topologies in more detail for three areas of the tree: 1) Cactaceae and relatives, 2) the early diverging branch within Cactaceae, and 3) with the placement of Basellaceae and Didiereaceae. To do this, we constructed constraint trees for each alternative topology, calculated likelihood scores for each gene tree with the individual topology constraints, and then compared the likelihood scores for each alternative resolution in each gene.

### **Inference of gene and genome duplication**

To infer gene duplication, we first assessed clade support using the SH-like test (Anisimova et al. 2011) in RAxML for each homolog tree. Nodes with SH-like support > 80 were considered in the gene duplication inference. Using *Beta vulgaris* as outgroup, we extracted 8,332 rooted clusters (each include 30 or more taxa, Yang et al. 2015), identified duplication events from them, and mapped those events to the corresponding node or MRCA (if gene tree had missing taxa or a conflicting topology) on the rooted concatenated ML tree using Phyparts. Gene duplication was recorded at a node if its two children clades shared two or more taxa.

In addition to mapping phylogenetic locations of gene duplications, potential genome duplication events were also inferred using the frequency distribution of synonymous substitution rate (Ks plot) following the same process of Yang et al. (2015). Briefly, we reduced highly similar PEP sequences (by CD-HIT: -c 0.99 -n 5) for each of the 82 species, and conducted an all-by-all BLASTP (-evalue = 10, -max\_target\_seq = 20) and removed highly divergent hits with < 20% similarity (pidnt) or < 50 aligned amino acids (nidnt). Sequences with ten or more hits were also removed to eliminate large gene families. We then used the PEP and corresponding CDS from paralogous pairs to calculate Ks values using pipeline [https://github.com/tanghaibao/biopipeline/tree/master/synonymous\\_calculation](https://github.com/tanghaibao/biopipeline/tree/master/synonymous_calculation), which aligns paralogous pairs with ClustalW (Larkin et al. 2007) and infers Ks values using codeml in PAML (Yang 2007) with Nei–Gojobori correction for multiple substitutions (Nei and Gojobori 1986). Peaks in the distribution of Ks suggest the presence and relative timing of ancient genome duplication events (Lynch and Conery 2000; Blanc and Wolfe 2004; Schlueter et al. 2004; Cannon et al. 2014).

To determine whether a potential WGD event occurred before or after a particular speciation event, we calculated between-species Ks distribution using orthologous gene pairs (Cannon et al. 2014). The procedure is similar as above, except that a reciprocal BLASTP was carried out between two species instead of an all-by-all BLASTP within one taxon. Gene pairs with reciprocal best hits were used for calculating the Ks distribution. The between-species Ks distribution was then compared to

within-species Ks in each species to determine the relative timing of the WGD versus the speciation event.

### Annotation of expanded gene families

To investigate gene function and GO (gene ontology) terms overrepresentation, the CDSs from *Arabidopsis thaliana* (release-34) were obtained from EnsemblPlants and used as a BLASTN database, while its gene IDs were used for GO analyses. We conducted two separate analyses. First, we identified clades with large number of gene duplications [i.e., > 160 (2%) gene duplications as in node 15, 17 and 19 of Montiaceae, node 27 of Didieraceae, node 35, 39, 50 of Cactaceae, and node 71 of Portulacaceae, fig. 1], conducted BLASTN (-evalue 10) of these duplication genes (ten randomly selected sequences from each gene) in each clade against the database of *A. thaliana*. A random *A. thaliana* gene ID was chosen when multiple query sequences from one gene returned divergent top hits, and the percentage of identifiable genes were similar among clades (~35%, table 1). Assuming genes duplicated at the origin of Portulacaceae (Node 13) retained in all children clades, we use them as background to detect potential overrepresentation of genes that recently duplicated in specific child clade using the GO overrepresentation test of the online version of PANTHER (<http://www.pantherdb.org>). We corrected for multiple tests using a Bonferroni correction. Here overrepresentation is unrelated to gene expression level, instead, it refers to the overrepresentation of genes in a specific functional category in one clade compared to another.

Second, we summarized each of the 8,592 homologous gene statistics such as the total number of tips, the total number of taxa, clades with the maximum number of average taxon repeats, and the taxon with the maximum number of tips. We then conducted manual annotation through BLASTX against the nonredundant protein database in NCBI by using a relatively long and complete PEP sequence from each of the top 20 genes with the highest total number of tips.

### Identification of lineage-specific selection on stress response genes

To test if genes associated with abiotic stress response are under positive selection, we carried out selection analyses on a targeted set of 29 genes that are previously known to be associated with cold and/or drought adaptation, and also exist in our 8,592 homologous dataset (table 4). We first repeated the homolog filtering processes as indicated above three more times to reduce potential assembly or clustering errors of the chosen homologs. Their CDS sequences were then aligned based on the corresponding peptide MAFFT alignments using phyx program (Brown et al. 2017). After trimming the CDS alignment by Phyutility (-clean 0.1), a ML tree was built for each homolog in RAxML with

GTR+GAMMA model and rooted with outgroup species using the same three-level criteria (see above). Lineage specific selection was calculated for each homologous gene in HyPhy v2.2.4 (Pond and Muse 2005) using an adaptive branch-site random effects likelihood test (aBSREL, Smith MD et al. 2015). Generally, the ratio of the nonsynonymous to the synonymous substitutions ( $\omega$ ) was used to measure the extent pressure of natural selection, with  $\omega > 1$  representing positive selection,  $\omega \sim 1$  indicating neutral evolution, and  $\omega < 1$  representing purifying or negative selection (Yang 2006). aBSREL automatically infers an appropriate model among branches. It allows non-synonymous substitution to vary across sites, and synonymous rate can vary from branch to branch. This way  $\omega$  varies among branches as well as among sites. The aBSREL test first fits the MG94xREV nucleotide substitution model to estimate a single  $\omega$  for each branch, then greedily add  $\omega$  categories to each branch after sorting them by length. The optimal number of  $\omega$  categories was selected according to AICc scores. In our analyses, all internal branches were tested. The branches with episodic positive selection that show significant proportion of sites with  $\omega > 1$  were chosen with  $p < 0.05$  after applying the Holm-Bonferroni multiple testing correction. Finally, lineages subject to positive selection were labeled on each homologous tree. We also summarized the number lineages under positive selection both on the whole tree and within each focal clade (e.g., the major families within Portulacineae, fig. 1).

## Supplementary Material

Supplementary data are available at Molecular Biology and Evolution online.

## Acknowledgments

The authors thank Wynn Anderson, the Bureau of Land Management, the US Forest Service, and the staff of Desert Botanical Garden, Sukkulenten-Sammlung Zürich, Cambridge University Botanic Garden, Missouri Botanical Garden, and the Oberlin College Greenhouse for permission to collect specimens, and thank Hilda Flores, Helga Ochoterena, and Norman Douglas for help with collecting. The authors also thank Jeet Sukumaran for constructive discussion on gene tree discordance. Special thanks to Oscar Vargas for a thorough review of the paper. This work was supported by NSF DEB 1354048 to SAS and NSF DEB 1352907 to MJM.

## References

Abbasi F, Onodera H, Toki S, Tanaka H, Komatsu S. 2004. OsCDPK13, a calcium-dependent protein kinase gene from rice, is induced by cold and gibberellin in rice leaf sheath. *Plant Mol Biol.* 55(4):541–552.

605 Alfaro ME, Zoller S, Lutzoni F. 2003. Bayes or bootstrap? A simulation study comparing the performance of  
606 Bayesian Markov chain Monte Carlo sampling and bootstrapping in assessing phylogenetic  
607 confidence. *Mol Biol Evol.* 20(2):255–266.

608 Anderson EF. 2001. The Cactus Family, Pentland, Oregon: Timber Press.

609 Angiosperm Phylogeny Group. 2016. An update of the Angiosperm Phylogeny Group classification for the  
610 orders and families of flowering plants: APG IV. *Bot J Linean Soc.* 181(1):1–20.

611 Anisimova M, Gil M, Dufayard JF, Dessimoz C, Gascuel O. 2011. Survey of branch support methods  
612 demonstrates accuracy, power, and robustness of fast likelihood-based approximation schemes. *Syst Biol.*  
613 60(5):685–699.

614 Anton AM, Hernández-Hernández T, De-Nova A, Sosa V. 2014. Evaluating the phylogenetic position of the  
615 monotypic family Halophytaceae (Portulacinae, Caryophyllales) based on plastid and nuclear molecular  
616 data sets. *Bot Sci.* 92(3):351–361.

617 Applequist WL, Wagner WL, Zimmer EA, Nepokroeff M. 2006. Molecular evidence resolving the systematic  
618 position of *Hectorella* (Portulacaceae). *Syst Bot.* 31(2):310–319.

619 Applequist WL, Wallace RS. 2000. Phylogeny of the Madagascan endemic family Didiereaceae. *Plant Syst Evol.*  
620 221(3):157–166.

621 Applequist WL, Wallace RS. 2001. Phylogeny of the portulacaceous cohort based on *ndhF* sequence data. *Syst*  
622 *Bot.* 26(2):406–419.

623 Applequist WL, Wallace RS. 2003. Expanded circumscription of Didiereaceae and its division into three  
624 subfamilies. *Adansonia* 25(1):13–16.

625 Arakaki M, Christin PA, Nyffeler R, Lendel A, Eggli U, Ogburn RM, Spriggs E, Moore MJ, Edwards EJ. 2011.  
626 Contemporaneous and recent radiations of the world's major succulent plant lineages. *Proc Natl Acad*  
627 *Sci USA.* 108(20):8379–8384.

628 Bárcenas RT, Yesson C, Hawkins JA. 2011 Molecular systematics of the Cactaceae. *Cladistics* 27:470–489

629 Barthlott W, Hunt DR. 1993. Cactaceae. In Flowering Plants Dicotyledons Springer Berlin Heidelberg. p. 161–  
630 197.

631 Blanc G, Wolfe KH. 2004. Widespread paleopolyploidy in model plant species inferred from age distributions of  
632 duplicate genes. *Plant Cell* 16(7):1667–1678.

633 Bolger AM, Lohse M, Usadel B. 2014. Trimmomatic: a flexible trimmer for Illumina sequence data.  
634 *Bioinformatics* 30(15):2114–2120.

635 Borland AM, Griffiths H, Hartwell J, Smith JA. 2009. Exploiting the potential of plants with crassulacean acid  
636 metabolism for bioenergy production on marginal lands. *J Exp Bot.* 60(10):2879–2896.

637 Brandt B, Brodsky DE, Xue S, Negi J, Iba K, Kangasjärvi J, Ghassemian M, Stephan AB, Hu H, Schroeder JJ.  
638 2012. Reconstitution of abscisic acid activation of SLAC1 anion channel by CPK6 and OST1 kinases  
639 and branched ABI1 PP2C phosphatase action. *Proc Natl Acad Sci USA.* 109(26):10593–10598.



640 Brochmann C, Brysting AK, Alsos IG, Borgen L, Grundt HH, Scheen AC, Elven R. 2004. Polyploidy in arctic  
641 plants. *Bio J Linnean Soc.* 82:521–536.

642 Brockington SF, Yang Y, Gandia-Herrero F, Covshoff S, Hibberd JM, Sage RF, Wong GK, Moore MJ, Smith  
643 SA. 2015. Lineage-specific gene radiations underlie the evolution of novel betalain pigmentation in  
644 Caryophyllales. *New Phytol.* 207:1170–1180.

645 Brown JM, Thomson RC. 2017. Bayes factors unmask highly variable information content, bias, and extreme  
646 influence in phylogenomic analyses. *Syst Biol.* 66:517–530.

647 Brown JW, Walker JF, Smith SA. 2017. Phyx: phylogenetic tools for unix. *Bioinformatics* 33(12):1886–1888.

648 Bruyns PV, Oliveira-Neto M, Melo-de-Pinna GF, Klak C. 2014. Phylogenetic relationships in the Didiereaceae  
649 with special reference to subfamily Portulacarioideae. *Taxon* 63(5):1053–1064.

650 Butterworth CA, Cota-Sanchez JH, Wallace RS. 2002. Molecular systematics of tribe Cacteeae (Cactaceae:  
651 Cactoideae): a phylogeny based on rpl16 intron sequence variation. *Syst Bot.* 27(2):257–270.

652 Butterworth CA, Wallace RS. 2005. Molecular phylogenetics of the leafy cactus genus *Pereskia* (Cactaceae).  
653 *Syst Bot.* 30(4):800–808.

654 Cannon SB, McKain MR, Harkess A, Nelson MN, Dash S, Deyholos MK, Peng Y, Joyce B, Stewart Jr CN, Rolf  
655 M, Kutchan T. 2014. Multiple polyploidy events in the early radiation of nodulating and nonnodulating  
656 legumes. *Mol Biol Evol.* 32(1):193–210.

657 Chan KX, Wirtz M, Phua SY, Estavillo GM, Pogson BJ. 2013. Balancing metabolites in drought: the sulfur  
658 assimilation conundrum. *Trends Plant Sci.* 18(1):18–29.

659 Chaves MM, Maroco JP, Pereira JS. 2003. Understanding plant responses to drought—from genes to the whole  
660 plant. *Funct Plant Biol.* 30(3):239–264.

661 Chinnusamy V, Ohta M, Kanrar S, Lee BH, Hong X, Agarwal M, Zhu JK. 2003. ICE1: a regulator of cold-  
662 induced transcriptome and freezing tolerance in Arabidopsis. *Genes Dev.* 17(8):1043–1054.

663 Christin PA, Arakaki M, Osborne CP, Bräutigam A, Sage RF, Hibberd JM, Kelly S, Covshoff S, Wong GK,  
664 Hancock L, Edwards EJ. 2014. Shared origins of a key enzyme during the evolution of C4 and CAM  
665 metabolism. *J Exp Bot.* 65:3609–3621.

666 Christin PA, Salamin N, Savolainen V, Duvall MR, Besnard G. 2007. C4 Photosynthesis Evolved in Grasses via  
667 Parallel Adaptive Genetic Changes. *Curr Biol.* 17:1241–1247.

668 Cui L, Wall PK, Leebens-Mack JH, Lindsay BG, Soltis DE, Doyle JJ, Soltis PS, Carlson JE, Arumuganathan K,  
669 Barakat A, Albert VA. 2006. Widespread genome duplications throughout the history of flowering  
670 plants. *Genome Res.* 16(6):738–749.

671 Cushman JC. 2001. Crassulacean acid metabolism. A plastic photosynthetic adaptation to arid environments.  
672 *Plant Physiol.* 127:1439–1448.

673 Degnan JH, Rosenberg NA. 2009. Gene tree discordance, phylogenetic inference and the multispecies coalescent.  
674 *Trends Ecol Evol.* 24(6):332–340.

675 Dohm JC, Minoche AE, Holtgräwe D, Capella-Gutiérrez S, Zakrzewski F, Tafer H, Rupp O, Sørensen TR,  
676 Stracke R, Reinhardt R, Goesmann A. 2014. The genome of the recently domesticated crop plant sugar  
677 beet (*Beta vulgaris*). *Nature* 505(7484):546–549.

678 Edwards EJ, Nyffeler R, Donoghue MJ. 2005. Basal cactus phylogeny: implications of *Pereskia* (Cactaceae)  
679 paraphyly for the transition to the cactus life form. *Am J Bot.* 92(7):1177–1188.

680 Edwards EJ, Ogburn RM. 2012. Angiosperm responses to a low-CO<sub>2</sub> world: CAM and C<sub>4</sub> photosynthesis as  
681 parallel evolutionary trajectories. *Int J of Plant Sci.* 173(6):724–733.

682 Edwards G, Walker D. 1983. C<sub>3</sub>, C<sub>4</sub>: mechanisms, and cellular and environmental regulation, of photosynthesis.  
683 University of California Press.

684 Emms DM, Covshoff S, Hibberd JM, Kelly S. 2016. Independent and parallel evolution of new genes by gene  
685 duplication in two origins of C<sub>4</sub> photosynthesis provides new insight into the mechanism of phloem  
686 loading in C<sub>4</sub> species. *Mol Biol Evol.* 33(7):1796–1806.

687 Ferreyra MLF, Andreo CS, Podestá FE. 2003. Purification and physical and kinetic characterization of a  
688 photosynthetic NADP-dependent malic enzyme from the CAM plant *Aptenia cordifolia*. *Plant Sci.*  
689 164(1):95–102.

690 Fournier-Level A, Korte A, Cooper MD, Nordborg M, Schmitt J, Wilczek AM. 2011. A map of local adaptation  
691 in *Arabidopsis thaliana*. *Science* 334(6052):86–89.

692 Fu L, Niu B, Zhu Z, Wu S, Li W. 2012. CD-HIT: accelerated for clustering the next-generation sequencing data.  
693 *Bioinformatics* 28(23):3150–3152.

694 Geiger D, Scherzer S, Mumm P, Marten I, Ache P, Matschi S, Liese A, Wellmann C, Al-Rasheid KA, Grill E,  
695 Romeis T, Hedrich R. 2010. Guard cell anion channel SLAC1 is regulated by CDPK protein kinases  
696 with distinct Ca<sup>2+</sup> affinities. *Proc Natl Acad Sci USA.* 107(17):8023–8028.

697 Georges F, Das S, Ray H, Bock C, Nokhrina K, Kolla VA, Keller W. 2009. Over-expression of *Brassica napus*  
698 phosphatidylinositol-phospholipase C2 in canola induces significant changes in gene expression and  
699 phytohormone distribution patterns, enhances drought tolerance and promotes early flowering and  
700 maturation. *Plant Cell Environ.* 32(12):1664–1681.

701 Gibson AC, Nobel PS. 1990. The cactus primer. Harvard University Press

702 Gibson AC. 1996. Structure–function relations of warm desert plants. New York, NY, USA: Springer.

703 Golldack D, Li C, Mohan H, Probst N. 2014. Tolerance to drought and salt stress in plants: unraveling the  
704 signaling networks. *Front Plant Sci.* 5:151.

705 Gosti F, Beaudoin N, Serizet C, Webb AA, Vartanian N, Giraudat J. 1999. ABI1 protein phosphatase 2C is a  
706 negative regulator of abscisic acid signaling. *Plant Cell* 11(10):1897–1909.

707 Gowik U, Bräutigam A, Weber KL, Weber APM, Westhof P. 2011. Evolution of C<sub>4</sub> photosynthesis in the genus  
708 *Flaveria*: how many and which genes does it take to make C<sub>4</sub>? *Plant Cell* 23:2087–2105.

709 Grabherr MG, Haas BJ, Yassour M, Levin JZ, Thompson DA, Amit I, Adiconis X, Fan L, Raychowdhury R,  
710 Zeng Q, Chen Z. 2011. Full-length transcriptome assembly from RNA-Seq data without a reference  
711 genome. *Nat Biotechnol.* 29(7):644–652.

712 Griffith MP, Porter JM. 2009. Phylogeny of Opuntioideae (Cactaceae). *International J Plant Sci.* 170:107–116.

713 Haas BJ, Papanicolaou A, Yassour M, Grabherr M, Blood PD, Bowden J, Couger MB, Eccles D, Li B, Lieber M,  
714 MacManes MD. 2013. De novo transcript sequence reconstruction from RNA-seq using the Trinity  
715 platform for reference generation and analysis. *Nature Protoc.* 8(8):1494–1512.

716 Hernández-Hernández T, Hernández HM, De-Nova JA, Puente R, Eguiarte LE, Magallón S. 2011. Phylogenetic  
717 relationships and evolution of growth form in Cactaceae (Caryophyllales, Eudicotyledoneae). *Am J Bot.*  
718 98(1):44–61.

719 Hernández-Ledesma P, Berendsohn WG, Borsch T, Mering SV, Akhiani H, Arias S, Castañeda-Noa I, Eggli U,  
720 Eriksson R, Flores-Olvera H, Fuentes-Bazán S. 2015. A taxonomic backbone for the global synthesis of  
721 species diversity in the angiosperm order Caryophyllales. *Willdenowia* 45(3):281–383.

722 Hernández-Hernández T, Brown JW, Schlumpberger BO, Eguiarte LE, Magallón S. 2014. Beyond aridification:  
723 multiple explanations for the elevated diversification of cacti in the New World Succulent Biome. *New*  
724 *Phytol.* 202(4):1382–1397.

725 Hershkovitz MA, Zimmer EA. 1997. On the evolutionary origins of the cacti. *Taxon* 46(2):217–232.

726 Hochstrasser M. 2009. Origin and function of ubiquitin-like proteins. *Nature* 458(7237):422–429.

727 Huang Q, Wang Y, Li B, Chang J, Chen M, Li K, Yang G, He G. 2015. TaNAC29, a NAC transcription factor  
728 from wheat, enhances salt and drought tolerance in transgenic Arabidopsis. *BMC Plant Biol.* 15(1):268.

729 Hubbard KE, Nishimura N, Hitomi K, Getzoff ED, Schroeder JI. 2010. Early abscisic acid signal transduction  
730 mechanisms: newly discovered components and newly emerging questions. *Genes Dev.* 24(16):1695–  
731 1708.

732 Jarvis ED, Mirarab S, Aberer AJ, Li B, Houde P, Li C, Ho SY, Faircloth BC, Nabholz B, Howard JT, Suh  
733 A. 2014. Whole-genome analyses resolve early branches in the tree of life of modern  
734 birds. *Science* 346(6215):1320–1331.

735 Jeong JS, Kim YS, Baek KH, Jung H, Ha SH, Do Choi Y, Kim M, Reuzeau C, Kim JK. 2010. Root-specific  
736 expression of OsNAC10 improves drought tolerance and grain yield in rice under field drought  
737 conditions. *Plant Physiol.* 153:185–197

738 Jiao Y, Wickett NJ, Ayyampalayam S, Chanderbali AS, Landherr L, Ralph PE, Tomsho LP, Hu Y, Liang H,  
739 Soltis PS, Soltis DE. 2011. Ancestral polyploidy in seed plants and angiosperms. *Nature* 473(7345):97–  
740 100.

741 Jiang Y, Deyholos MK. 2009. Functional characterization of Arabidopsis NaCl-inducible WRKY25 and  
742 WRKY33 transcription factors in abiotic stresses. *Plant Mol Biol.* 69(1–2):91–105.

743 Katoh K, Standley DM. 2013. MAFFT multiple sequence alignment software version 7: improvements in  
744 performance and usability. *Mol Biol Evol.* 30(4):772–780.

745 Kiang JG, Tsokos GC. 1998. Heat shock protein 70 kDa: molecular biology, biochemistry, and physiology.  
746 *Pharmacol Ther.* 80(2):183–201.

747 Kreps JA, Wu Y, Chang HS, Zhu T, Wang X, Harper JF. 2002. Transcriptome changes for *Arabidopsis* in  
748 response to salt, osmotic, and cold stress. *Plant Physiol.* 130(4):2129–2141.

749 Larkin MA, Blackshields G, Brown NP, Chenna R, McGettigan PA, McWilliam H, Valentin F, Wallace IM,  
750 Wilm A, Lopez R, Thompson JD. 2007. Clustal W and Clustal X version 2.0. *Bioinformatics*  
751 23(21):2947–2948.

752 Lee EK, Cibrian-Jaramillo A, Kolokotronis SO, Katari MS, Stamatakis A, Ott M, Chiu JC, Little DP, Stevenson  
753 DW, McCombie WR, Martienssen RA. 2011. A functional phylogenomic view of the seed plants. *PLoS*  
754 *Genet.* 7(12):e1002411.

755 Li H, Chang J, Zheng J, Dong Y, Liu Q, Yang X, Wei C, Zhang Y, Ma J, Zhang X. 2017. Local melatonin  
756 application induces cold tolerance in distant organs of *Citrullus lanatus* L. via long distance  
757 transport. *Sci Rep.* 7:40858.

758 Li WH. 1997. Molecular evolution. Sinauer Associates, Sunderland, MA

759 Liu L, Pearl DK, Brumfield RT, Edwards SV. 2008. Estimating species trees using multiple-allele DNA  
760 sequence data. *Evolution* 62(8):2080–2091.

761 Liu L, Pearl DK. 2007. Species trees from gene trees: reconstructing Bayesian posterior distributions of a  
762 species phylogeny using estimated gene tree distributions. *Syst Biol.* 56(3):504–514.

763 Liu Z, Jia Y, Ding Y, Shi Y, Li Z, Guo Y, Gong Z, Yang S. 2017. Plasma Membrane CRPK1-Mediated  
764 Phosphorylation of 14-3-3 Proteins Induces Their Nuclear Import to Fine-Tune CBF Signaling during  
765 Cold Response. *Mol Cell* 66(1):117–128.

766 Löytynoja A, Goldman N. 2008. Phylogeny-aware gap placement prevents errors in sequence alignment and  
767 evolutionary analysis. *Science* 320(5883):1632–1635.

768 Lynch M, Conery JS. 2000. The evolutionary fate and consequences of duplicate genes. *Science*  
769 290(5494):1151–1155.

770 Maddison WP. 1997. Gene trees in species trees. *Syst Biol.* 46:523–536

771 Manavella PA, Arce AL, Dezar CA, Bitton F, Renou JP, Crespi M, Chan RL. 2006. Cross-talk between ethylene  
772 and drought signaling pathways is mediated by the sunflower Hahb-4 transcription factor. *Plant J.*  
773 48(1):125–137.

774 Masoomi-Aladizgeh F, Aalami A, Esfahani M, Aghaei MJ, Mozaffari K. 2015. Identification of CBF14 and  
775 NAC2 genes in *Aegilops tauschii* associated with resistance to freezing stress. *Appl Biochem Biotechnol.*  
776 176(4):1059–1070.

777 Mauseth JD. 2006. Structure–function relationships in highly modified shoots of Cactaceae. *Ann Bot.* 98(5):901–  
778 926.

779 Merlot S, Gosti F, Guerrier D, Vavasseur A, Giraudat J. 2001. The ABI1 and ABI2 protein phosphatases 2C act  
780 in a negative feedback regulatory loop of the abscisic acid signalling pathway. *Plant J.* 25(3):295–303.

781 Mirarab S, Nguyen N, Guo S, Wang LS, Kim J, Warnow T. 2015. PASTA: ultra-large multiple sequence  
782 alignment for nucleotide and amino-acid sequences. *J Comput Biol.* 22(5):377–386.

783 Mirarab S, Reaz R, Bayzid MS, Zimmermann T, Swenson MS, Warnow T. 2014. ASTRAL: genome-scale  
784 coalescent-based species tree estimation. *Bioinformatics* 30(17):i541–i548.

785 Mishra G, Zhang W, Deng F, Zhao J, Wang X. 2006. A bifurcating pathway directs abscisic acid effects on  
786 stomatal closure and opening in *Arabidopsis*. *Science* 312(5771):264–266.

787 Moore A, de Vos JM, Hancock LP, Goolsby E, Edwards EJ. 2017. Targeted Enrichment of Large Gene Families  
788 for Phylogenetic Inference: Phylogeny and Molecular Evolution of Photosynthesis Genes in the  
789 Portulacaceae (Caryophyllales). *Syst Biol.* doi:10.1093/sysbio/syx078.

790 Nakashima K, Takasaki H, Mizoi J, Shinozaki K, Yamaguchi-Shinozaki K. 2012. NAC transcription factors in  
791 plant abiotic stress responses. *Biochim Biophys Acta* 1819(2):97–103.

792 Nakashima K, Yamaguchi-Shinozaki K, Shinozaki K. 2014. The transcriptional regulatory network in the  
793 drought response and its crosstalk in abiotic stress responses including drought, cold, and heat. *Front*  
794 *Plant Sci.* 5:170.

795 Nei M, Gojobori T. 1986. Simple methods for estimating the numbers of synonymous and nonsynonymous  
796 nucleotide substitutions. *Mol Biol Evol.* 3(5):418–426.

797 Nyffeler R, Eggli U. 2010a. Disintegrating Portulacaceae: a new familial classification of the suborder  
798 Portulacineae (Caryophyllales) based on molecular and morphological data. *Taxon* 59(1):227–240.

799 Nyffeler R, Eggli U. 2010b. A farewell to dated ideas and concepts –molecular phylogenetics and a revised  
800 suprageneric classification of the family Cactaceae. *Schumannia* 6:109–149.

801 Nyffeler R. 2002. Phylogenetic relationships in the cactus family (Cactaceae) based on evidence from  
802 trnK/matK and trnL-trnF sequences. *Am J Bot.* 89:312–326.

803 Nyffeler R. 2007. The closest relatives of cacti: insights from phylogenetic analyses of chloroplast and  
804 mitochondrial sequences with special emphasis on relationships in the tribe Anacampseroteae. *Am J Bot.*  
805 94(1):89–101.

806 Ocampo G, Columbus JT. 2010. Molecular phylogenetics of suborder Cactineae (Caryophyllales), including  
807 insights into photosynthetic diversification and historical biogeography. *Am J Bot.* 97(11):1827–1847.

808 Ogburn RM, Edwards EJ. 2015. Life history lability underlies rapid climate niche evolution in the angiosperm  
809 clade Montiaceae. *Mol Phylogenet Evol.* 92:181–192.

810 Oh JE, Kwon Y, Kim JH, Noh H, Hong SW, Lee H. 2011. A dual role for MYB60 in stomatal regulation and  
811 root growth of *Arabidopsis thaliana* under drought stress. *Plant Mol Biol.* 77(1-2):91–103.

812 Pan Y, Seymour GB, Lu C, Hu Z, Chen X, Chen G. 2012. An ethylene response factor (ERF5) promoting  
813 adaptation to drought and salt tolerance in tomato. *Plant Cell Rep.* 31(2):349–360.



Peel MC, Finlayson BL, McMahon TA. 2007. Updated world map of the Köppen-Geiger climate classification. *Hydrol Earth Syst Sci.* 11:1633–1644.

Phillips MJ, Delsuc F, Penny D. 2004. Genome-scale phylogeny and the detection of systematic biases. *Mol Biol Evol.* 21:1455–1458.

Pond, S.L.K. and Muse, S.V., 2005. HyPhy: hypothesis testing using phylogenies. In: Statistical methods in molecular evolution. Springer, New York, NY. p. 125–181.

Price MN, Dehal PS, Arkin AP. 2009. FastTree: computing large minimum evolution trees with profiles instead of a distance matrix. *Mol Biol Evol.* 26(7):1641–1650.

Price MN, Dehal PS, Arkin AP. 2010. FastTree 2—approximately maximum-likelihood trees for large alignments. *PloS One* 5(3):e9490.

Qin F, Sakuma Y, Li J, Liu Q, Li YQ, Shinozaki K, Yamaguchi-Shinozaki K. 2004. Cloning and functional analysis of a novel DREB1/CBF transcription factor involved in cold-responsive gene expression in *Zea mays* L. *Plant Cell Physiol.* 45(8):1042–1052.

Reddy S, Kimball RT, Pandey A, Hosner PA, Braun MJ, Hackett SJ, Han KL, Harshman J, Huddleston CJ, Kingston S, et al. 2017. Why Do Phylogenomic Data Sets Yield Conflicting Trees? Data Type Influences the Avian Tree of Life more than Taxon Sampling. *Syst Biol.* 66:857–879.

Sajeevan RS, Nataraja KN, Shivashankara KS, Pallavi N, Gurumurthy DS, Shivanna MB. 2017. Expression of Arabidopsis SHN1 in Indian mulberry (*Morus indica* L.) increases leaf surface wax content and reduces post-harvest water loss. *Front Plant Sci.* 8:418.

Schlueter JA, Dixon P, Granger C, Grant D, Clark L, Doyle JJ, Shoemaker RC. 2004. Mining EST databases to resolve evolutionary events in major crop species. *Genome* 47(5):868–876.

Seo TK. 2008. Calculating bootstrap probabilities of phylogeny using multilocus sequence data. *Mol Biol Evol.* 25(5):960-971.

Shen X, Hittinger CT, Rokas A. 2017. Contentious relationships in phylogenomic studies can be driven by a handful of genes. *Nature Ecol Evol.* 1:1–10.

Silvera K, Winter K, Rodriguez BL, Albion RL, Cushman JC. 2014. Multiple isoforms of phosphoenol-pyruvate carboxylase in the Orchidaceae (subtribe Oncidiinae): implications for the evolution of crassulacean acid metabolism. *J Exp Bot.* 65(13):3623–3636.

Smith JAC, Winter K. 1996. Taxonomic distribution of crassulacean acid metabolism. In: Winter K, Smith JAC, eds. Crassulacean acid metabolism: biochemistry, ecophysiology and evolution. Berlin/Heidelberg: Springer-Verlag. p. 427–436.

Smith MD, Wertheim JO, Weaver S, Murrell B, Scheffler K, Kosakovsky Pond SL. 2015. Less is more: an adaptive branch-site random effects model for efficient detection of episodic diversifying selection. *Mol Biol Evol.* 32(5):1342–1353.



848 Smith SA, Brown JW, Yang Y, Bruenn R, Drummond CP, Brockington SF, Walker JF, Last N, Douglas NA,  
849 Moore MJ. 2018. Disparity, diversity, and duplications in the Caryophyllales. *New Phytol.* 217(2):836–  
850 854.

851 Smith SA, Dunn CW. 2008. Phyutility: a phyloinformatics tool for trees, alignments and molecular data.  
852 *Bioinformatics* 24(5):715–716.

853 Smith SA, Moore MJ, Brown JW, Yang Y. 2015. Analysis of phylogenomic datasets reveals conflict,  
854 concordance, and gene duplications with examples from animals and plants. *BMC Evol Biol.* 15(1):150.

855 Soltis DE, Smith SA, Cellinese N, Wurdack KJ, Tank DC, Brockington SF, Refulio-Rodriguez NF, Walker JB,  
856 Moore MJ, Carlswald BS, Bell CD. 2011. Angiosperm phylogeny: 17 genes, 640 taxa. *Am J Bot.*  
857 98(4):704–730.

858 Soltis PS, Soltis DE. 2009. The role of hybridization in plant speciation. *Annu Rev Plant Biol.* 60:561–588.

859 Soltis PS, Soltis DS. 2000. The role of genetic and genomic attributes in the success of polyploids. *Proc Natl*  
860 *Acad Sci USA.* 97:7051–7057.

861 Song L, Florea L. 2015. Rcorrector: Efficient and accurate error correction for Illumina RNA-seq reads.  
862 *GigaScience* 4:48

863 Song H, Zhao R, Fan P, Wang X, Chen X, Li Y. 2009. Overexpression of AtHsp90. 2, AtHsp90. 5 and AtHsp90.  
864 7 in *Arabidopsis thaliana* enhances plant sensitivity to salt and drought stresses. *Planta* 229(4):955–964.

865 Stamatakis A. 2015. Using RAxML to infer phylogenies. *Curr Protoc Bioinformatics.* 51:6.14.1-14.

866 Stebbins GL. 1971. Chromosomal evolution in higher plants. Addison Wesley, London. p. 216.

867 Stoughton TR, Jolles DD, O'Quinn RL. 2017. The western spring beauties, *Claytonia lanceolata* (Montiaceae): a  
868 review and revised taxonomy for California. *Syst Bot.* 42(2):283–300.

869 van den Bergh E, K  lahoglu C, Br  utigam A, Hibberd JM, Weber AP, Zhu XG, Schranz ME. 2014. Gene and  
870 genome duplications and the origin of C4 photosynthesis: Birth of a trait in the Cleomaceae. *Curr Plant*  
871 *Biol.* 1:2–9.

872 van Dongen S. 2000. Graph clustering by flow simulation [PhD thesis]. [Utrecht, The Netherlands]: University  
873 of Utrecht.

874 Vandeleur RK, Mayo G, Shelden MC, Gilliam M, Kaiser BN, Tyerman SD. 2009. The role of plasma  
875 membrane intrinsic protein aquaporins in water transport through roots: diurnal and drought stress  
876 responses reveal different strategies between isohydric and anisohydric cultivars of grapevine. *Plant*  
877 *Physiol.* 149(1):445–460.

878 Vanneste K, Van de Peer Y, Maere S. 2013. Inference of genome duplications from age distributions revisited.  
879 *Mol Biol Evol.* 30(1):177–90.

880 V  zquez-S  nchez M, Terrazas T, Arias S, Ochoterena H. 2013. Molecular phylogeny, origin and taxonomic  
881 implications of the tribe Cacteae (Cactaceae). *Sys Biodivers.* 11(1):103-116.

882 Vivek PJ, Tuteja N, Soniya EV. 2013. CDPK1 from ginger promotes salinity and drought stress tolerance  
883 without yield penalty by improving growth and photosynthesis in *Nicotiana tabacum*. *PLoS*  
884 *One* 8(10):e76392.

885 Walker JF, Yang Y, Feng T, Timoneda A, Mikenas J, Hutchinson V, Edwards C, Wang N, Ahluwalia S, Olivieri  
886 J, et al. 2018a. From cacti to carnivores: Improved phylotranscriptomic sampling and hierarchical  
887 homology inference provide further insight to the evolution of Caryophyllales. *Am J Bot.* special issue  
888 on the Plant Tree of Life, in press.

889 Walker JF, Brown JW, Smith, SA. 2018b. Analyzing contentious relationships and outlier genes in  
890 phylogenomics. *BioRxiv* doi: <https://doi.org/10.1101/115774>.

891 Walker JF, Yang Y, Moore MJ, Mikenas J, Timoneda A, Brockington SF, Smith SA. 2017. Widespread  
892 paleopolyploidy, gene tree conflict, and recalcitrant relationships among the carnivorous Caryophyllales.  
893 *Am J Bot.* 104(6):858–867.

894 Wallace RS, Dickie SL. 2002. Systematic implications of chloroplast DNA sequence variation in subfam.  
895 Opuntioideae (Cactaceae). *Succ. Pl. Res.* 6: 9–24.

896 Wang F, Chen HW, Li QT, Wei W, Li W, Zhang WK, Ma B, Bi YD, Lai YC, Liu XL, Man WQ. 2015.  
897 GmWRKY27 interacts with GmMYB174 to reduce expression of GmNAC29 for stress tolerance in  
898 soybean plants. *Plant J.* 83(2):224–236.

899 Wang L, Jin X, Li Q, Wang X, Li Z, Wu X. 2016. Comparative Proteomics Reveals that Phosphorylation of  $\beta$   
900 Carbonic Anhydrase 1 Might be Important for Adaptation to Drought Stress in *Brassica napus*. *Sci Rep.*  
901 6:39024.

902 Wang W, Vinocur B, Shoseyov O, Altman A. 2004. Role of plant heat-shock proteins and molecular chaperones  
903 in the abiotic stress response. *Trends Plant Sci.* 9(5):244–252.

904 Watson A. 1979. Gypsum crusts in deserts. *J Arid Environ.* 2(1):3–21.

905 Wendel JF. 2015. The wondrous cycles of polyploidy in plants. *Am J Bot.* 102:1753–1756.

906 Williams BP, Aubry S, Hibberd JM. 2012. Molecular evolution of genes recruited into C4  
907 photosynthesis. *Trends Plant Sci.* 17(4):213–220.

908 Wood TE, Takebayashi N, Barker MS, Mayrose I, Greenspoon PB, Rieseberg LH. 2009. The frequency of  
909 polyploid speciation in vascular plants. *Proc Natl Acad Sci USA.* 106:13875–13879.

910 Xie Z, Li D, Wang L, Sack FD, Grotewold E. 2010. Role of the stomatal development regulators FLP/MYB88  
911 in abiotic stress responses. *Plant J.* 64(5):731–739.

912 Yang L, Ji W, Zhu Y, Gao P, Li Y, Cai H, Bai X, Guo D. 2010. GsCBRLK, a calcium/calmodulin-binding  
913 receptor-like kinase, is a positive regulator of plant tolerance to salt and ABA stress. *J Exp Bot.*  
914 61(9):2519–2533.

915 Yang Y, Moore MJ, Brockington SF, Mikenas J, Olivieri J, Walker JF, Smith SA. 2018. Improved transcriptome  
916 sampling pinpoints 26 ancient and more recent polyploidy events in Caryophyllales, including two  
917 allopolyploidy events. *New Phytol.* 217(2):855–870

- 918 Yang Y, Moore MJ, Brockington SF, Soltis DE, Wong GKS, Carpenter EJ, Zhang Y, Chen L, Yan Z, Xie Y,  
919 Sage RF. 2015. Dissecting molecular evolution in the highly diverse plant clade Caryophyllales using  
920 transcriptome sequencing. *Mol Biol Evol.* 32(8):2001–2014.
- 921 Yang Y, Moore MJ, Brockington SF, Timoneda A, Feng T, Marx HE, Walker JF, Smith SA. 2017. An efficient  
922 field and laboratory workflow for plant phylotranscriptomic projects. *Appl Plant Sci.* 5(3):1600128
- 923 Yang Y, Smith SA. 2014. Orthology inference in nonmodel organisms using transcriptomes and low-coverage  
924 genomes: improving accuracy and matrix occupancy for phylogenomics. *Mol Biol Evol.* 31(11):3081–  
925 3092.
- 926 Yang Z. 2006. Computational Molecular Evolution. Oxford: Oxford University Press. p. 357
- 927 Yang Z. 2007. PAML 4: phylogenetic analysis by maximum likelihood. *Mol Biol Evol.* 24(8):1586–1591.
- 928 Yang T, Shad Ali G, Yang L, Du L, Reddy AS, Poovaiah BW. 2010. Calcium/calmodulin-regulated receptor-  
929 like kinase CRLK1 interacts with MEKK1 in plants. *Plant Signal Behav.* 5(8):991–994.
- 930 Yoshida R, Umezawa T, Mizoguchi T, Takahashi S, Takahashi F, Shinozaki K. 2006. The regulatory domain of  
931 SRK2E/OST1/SnRK2. 6 interacts with ABI1 and integrates abscisic acid (ABA) and osmotic stress  
932 signals controlling stomatal closure in Arabidopsis. *J Biol Chem.* 281(8):5310–5318.
- 933 Yoshida T, Fujita Y, Sayama H, Kidokoro S, Maruyama K, Mizoi J, Shinozaki K, Yamaguchi-Shinozaki K.  
934 2010. AREB1, AREB2, and ABF3 are master transcription factors that cooperatively regulate ABRE-  
935 dependent ABA signaling involved in drought stress tolerance and require ABA for full activation. *Plant*  
936 *J.* 61(4):672–685.
- 937 Yuan LL, Zhang M, Yan X, Bian YW, Zhen SM, Yan YM. 2016. Dynamic phosphoproteome analysis of  
938 seedling leaves in *Brachypodium distachyon* L. reveals central phosphorylated proteins involved in the  
939 drought stress response. *Sci Rep.* 6:35280.
- 940 Zhu JK. 2016. Abiotic stress signaling and responses in plants. *Cell* 167(2):313–324.
- 941 Zou JJ, Wei FJ, Wang C, Wu JJ, Ratnasekera D, Liu WX, Wu WH. 2010. Arabidopsis calcium-dependent  
942 protein kinase CPK10 functions in abscisic acid-and Ca<sup>2+</sup>-mediated stomatal regulation in response to  
943 drought stress. *Plant Physiol.* 154(3):1232–1243.

947 Table 1. Summary of clade-specific duplication genes and identifiable GO terms  
948

| Node number | Duplicated homologs | Identifiable AtIDs <sup>1</sup> | Mapped IDs <sup>2</sup> | Percent identifiability | Duplication events |
|-------------|---------------------|---------------------------------|-------------------------|-------------------------|--------------------|
| Node 13     | 761                 | 341                             | 329                     | 0.45                    | 1118               |
| Node 15     | 167                 | 94                              | 90                      | 0.56                    | 187                |
| Node 17     | 1516                | 459                             | 457                     | 0.30                    | 1589               |
| Node 19     | 376                 | 117                             | 117                     | 0.31                    | 388                |
| Node 26     | 111                 | 61                              | 54                      | 0.55                    | 111                |
| Node 27     | 3383                | 1082                            | 1065                    | 0.32                    | 4171               |
| Node 35     | 534                 | 217                             | 212                     | 0.41                    | 612                |
| Node 39     | 474                 | 161                             | 159                     | 0.34                    | 532                |
| Node 50     | 276                 | 97                              | 95                      | 0.35                    | 315                |
| Node 71     | 155                 | 55                              | 55                      | 0.35                    | 170                |

949 NOTE.—Node number corresponds to Fig. 1. <sup>1</sup>Identifiable *Arabidopsis* IDs;

950 <sup>2</sup>Genes that can be mapped in PANTHER.

951 Table 2. GO overrepresentation analyses on specific clades  
952

| Node number                                                                  | 13  |     |      |     |      | 15  |       |     |       |     | 27   |     |       |     |      | 35  |       |  |  |  |
|------------------------------------------------------------------------------|-----|-----|------|-----|------|-----|-------|-----|-------|-----|------|-----|-------|-----|------|-----|-------|--|--|--|
| Gene Ontology term                                                           | Ob. | Ob. | Exp. | +/- | p    | Ob. | Exp.  | +/- | p     | Ob. | Exp. | +/- | p     | Ob. | Exp. | +/- | p     |  |  |  |
| chromatin binding (GO:0003682)                                               | 1   | 0   | 0.28 | -   | 1    | 11  | 3.17  | +   | 0.028 | 1   | 0.64 | +   | 1     | 1   | 0.64 | +   | 1     |  |  |  |
| translation regulator activity (GO:0045182)                                  | 1   | 0   | 0.28 | -   | 1    | 12  | 3.17  | +   | 0.007 | 3   | 0.64 | +   | 1     | 3   | 0.64 | +   | 1     |  |  |  |
| sequence-specific DNA binding TF <sup>1</sup> activity (GO:0003700)          | 4   | 1   | 1.1  | -   | 1    | 29  | 12.69 | +   | 0.003 | 5   | 2.55 | +   | 1     | 5   | 2.55 | +   | 1     |  |  |  |
| calcium ion binding (GO:0005509)                                             | 1   | 5   | 0.28 | +   | 6E-4 | 15  | 3.17  | +   | 8E-5  | 3   | 0.64 | +   | 1     | 3   | 0.64 | +   | 1     |  |  |  |
| hydrolase activity, acting on ester bonds (GO:0016788)                       | 7   | 4   | 1.93 | +   | 1    | 40  | 22.21 | +   | 0.056 | 14  | 4.45 | +   | 0.028 | 14  | 4.45 | +   | 0.028 |  |  |  |
| rRNA metabolic process (GO:0016072)                                          | 1   | 0   | 0.28 | -   | 1    | 11  | 3.17  | +   | 0.041 | 2   | 0.64 | +   | 1     | 2   | 0.64 | +   | 1     |  |  |  |
| sulfur compound metabolic process (GO:0006790)                               | 1   | 0   | 0.28 | -   | 1    | 11  | 3.17  | +   | 0.041 | 1   | 0.64 | +   | 1     | 1   | 0.64 | +   | 1     |  |  |  |
| regulation of transcription from RNA P-II <sup>2</sup> promoter (GO:0006357) | 2   | 0   | 0.55 | -   | 1    | 18  | 6.35  | +   | 0.01  | 0   | 1.27 | -   | 1     | 0   | 1.27 | -   | 1     |  |  |  |
| transcription, DNA-dependent (GO:0006351)                                    | 6   | 2   | 1.65 | +   | 1    | 39  | 19.04 | +   | 0.003 | 3   | 3.82 | -   | 1     | 3   | 3.82 | -   | 1     |  |  |  |

953 NOTE.—Node number corresponds to Fig. 1. Ob. : Observed number; Exp. : Expected number; +/-: over or under representative. Italic: p <  
954 0.05, Bold: p < 0.01. <sup>1</sup>TF: transcription factor; <sup>2</sup>RNA P-II: RNA polymerase II.

955 Table 3. Portulacineae clades with the highest total number of tips  
 956

| clusterID             | Ntip | Ntaxa | Represented ID | Annotation                                                                                      |
|-----------------------|------|-------|----------------|-------------------------------------------------------------------------------------------------|
| cluster1_2rr_1rr_2rr  | 949  | 82    | AT5G62690.1    | tubulin beta chain [ <i>Spinacia oleracea</i> ]                                                 |
| cluster2_1rr_1rr_1rr  | 871  | 82    | AT5G02500.2    | heat shock cognate 70 kDa protein-like [ <i>Nicotiana tabacum</i> ]                             |
| cluster4_1rr_1rr_1rr  | 698  | 82    | AT5G09810.1    | Actin-11, NBD sugar-kinase HSP70 actin [ <i>Chenopodium quinoa</i> ]                            |
| cluster3_3rr_1rr_1rr  | 670  | 81    | AT1G55060.1    | Polyubiquitin-A [ <i>Triticum urartu</i> ]                                                      |
| cluster5_1rr_1rr_1rr  | 655  | 82    | AT2G18960.3    | plasma membrane H <sup>+</sup> ATPase 9 [ <i>Sesuvium portulacastrum</i> ]                      |
| cluster8_1rr_1rr_1rr  | 582  | 82    | AT5G19780.1    | tubulin alpha-3 chain [ <i>Vitis vinifera</i> ]                                                 |
| cluster12_1rr_1rr_1rr | 565  | 82    | AT3G14940.2    | phosphoenolpyruvate carboxylase [ <i>Suaeda aralocaspica</i> ]                                  |
| cluster43_1rr_1rr_1rr | 488  | 81    | AT3G08690.1    | ubiquitin-conjugating enzyme E2 28 [ <i>Solanum lycopersicum</i> ]                              |
| cluster18_1rr_1rr_1rr | 472  | 82    | AT4G14350.4    | serine/threonine-protein kinase tricornet isoform X1 [ <i>Beta vulgaris vulgaris</i> ]          |
| cluster22_1rr_1rr_1rr | 467  | 82    | AT2G19900.1    | NADP-dependent malic enzyme [ <i>Hylocereus undatus</i> ]                                       |
| cluster15_1rr_1rr_1rr | 463  | 82    | AT5G37310.2    | transmembrane 9 superfamily member 3 [ <i>Chenopodium quinoa</i> ]                              |
| cluster17_1rr_1rr_1rr | 462  | 82    | AT2G21050.1    | auxin transporter-like protein 2 [ <i>Chenopodium quinoa</i> ]                                  |
| cluster19_1rr_1rr_1rr | 461  | 82    | AT2G37170.2    | plasma membrane intrinsic protein 2 [ <i>Sesuvium portulacastrum</i> ]                          |
| cluster7_1rr_1rr_1rr  | 456  | 81    | AT1G26190.2    | uridine-cytidine kinase C isoform X1 [ <i>Beta vulgaris vulgaris</i> ]                          |
| cluster26_1rr_1rr_1rr | 435  | 82    | AT4G01850.1    | S-adenosylmethionine synthase 1 [ <i>Beta vulgaris vulgaris</i> ]                               |
| cluster14_1rr_1rr_1rr | 467  | 82    | AT4G30270.2    | probable xyloglucan endotransglucosylase/hydrolase protein 23 [ <i>Beta vulgaris vulgaris</i> ] |
| cluster6_2rr_1rr_1rr  | 530  | 81    | AT4G32880.1    | homeobox-leucine zipper protein ATHB-15 isoform X1 [ <i>Beta vulgaris vulgaris</i> ]            |
| cluster9_1rr_1rr_1rr  | 527  | 81    | AT3G29030.2    | expansin-A10-like [ <i>Chenopodium quinoa</i> ]                                                 |
| cluster16_1rr_1rr_1rr | 438  | 82    | AT5G06600.3    | ubiquitin carboxyl-terminal hydrolase 12 [ <i>Beta vulgaris vulgaris</i> ]                      |
| cluster37_1rr_1rr_1rr | 435  | 82    | AT1G22300.2    | 14-3-3 protein 10-like [ <i>Chenopodium quinoa</i> ]                                            |

957 NOTE.—Ntip: number of tips, Ntaxa: number of taxa



958 Table 4. Selection analyses on genes associated with cold and drought  
 959

| clusterID          | Gene                   | TN  | TS | M7 | Cac35 | Did27 | Mont | Port | SH80                | No support constraint           | References                    |
|--------------------|------------------------|-----|----|----|-------|-------|------|------|---------------------|---------------------------------|-------------------------------|
| cluster1007        | CDPK8                  | 184 | 2  | 0  | 1     | 0     | 0    | 0    | 13,27,71            | 2,13,27,35,71                   | Wang et al. 2016              |
| cluster1037        | WRKY33                 | 165 | 13 | 1  | 4     | 2     | 3    | 1    | 17,27               | 0,17,27                         | Jiang and Deyholos 2009       |
| cluster112         | HSP70                  | 270 | 10 | 0  | 3     | 1     | 1    | 2    | 0,19,27,33,49,51,52 | 0,19,27,33,39,49,51,50,52,56    | Kiang and Tsokos 1998         |
| cluster1131        | ICE1                   | 194 | 10 | 0  | 4     | 1     | 3    | 0    | 17,20,27,38         | 2,17,20,27,38,51,50             | Chinnusamy et al. 2003        |
| <b>cluster1181</b> | <b>ABI1/PP2Cfamily</b> | 151 | 17 | 1  | 6     | 2     | 4    | 0    | 27                  | 0,15,27,40                      | Merlot et al. 2001            |
| cluster1248        | NAC10                  | 158 | 16 | 1  | 6     | 4     | 3    | 1    | 27,39               | 2,19,27,39                      | Jeong et al. 2010             |
| cluster1349        | SNRK2.5                | 156 | 5  | 0  | 2     | 1     | 0    | 1    | 39                  | 0,27,34,35,39                   | Zhu 2016                      |
| cluster1418        | NAC29                  | 163 | 13 | 0  | 7     | 2     | 2    | 0    | 13                  | 13,17,27,39,44,50               | Wang et al. 2015              |
| cluster1864        | CDPK13                 | 156 | 3  | 0  | 0     | 0     | 0    | 2    | 27                  | 2,27,39                         | Abbasi et al. 2004            |
| cluster286         | MYB124 (FLP)           | 178 | 5  | 0  | 2     | 1     | 0    | 1    | 39                  | 6,17,19,27,39                   | Xie et al. 2010               |
| cluster3368        | SNRK2.4                | 125 | 1  | 0  | 0     | 0     | 0    | 0    | 17,27               | 2,15,17,27,30                   | Zhu 2016                      |
| cluster3966        | CDPK26                 | 117 | 3  | 0  | 1     | 1     | 0    | 1    | 0,17,27             | 0,17,27,39                      | Yuan et al. 2016              |
| cluster4535        | PLC2                   | 108 | 3  | 0  | 1     | 0     | 1    | 0    | 17,19,35            | 0,17,19,27,35                   | Georges et al. 2009           |
| cluster5012        | CDPK10                 | 85  | 1  | 0  | 1     | 0     | 0    | 0    | 27                  | 0,27,60                         | Zou et al. 2010               |
| cluster5640        | AREB1                  | 92  | 4  | 0  | 1     | 1     | 1    | 0    | 17,27               | 17,27                           | Yoshida et al. 2010           |
| cluster579         | NAC2                   | 157 | 4  | 0  | 2     | 0     | 0    | 1    | 27,39               | 0,27,39                         | Masoomi-Aladizgeh et al. 2015 |
| cluster582         | CDPK18                 | 196 | 13 | 1  | 6     | 1     | 0    | 0    | 2,13,21,35,57       | 2,13,18,21,24,27,35,40,47,57    | Li et al. 2017                |
| cluster584         | CRLK1                  | 170 | 2  | 0  | 2     | 0     | 0    | 0    | 27                  | 13,27,39,50                     | Yang et al. 2010              |
| cluster59          | HSP83                  | 305 | 5  | 0  | 1     | 1     | 0    | 0    | 0,13,17,27,34,76    | 0,13,15,17,19,24,27,34,39,50,76 | Wang et al. 2004              |
| cluster6422        | MYB60                  | 87  | 4  | 0  | 2     | 0     | 0    | 1    | 27                  | 27,40                           | Oh et al. 2011                |
| cluster643         | HSP90-5                | 213 | 8  | 1  | 2     | 2     | 1    | 1    | 26,27,34            | 2,19,26,27,34,39,71             | Song et al. 2009              |
| cluster6979        | CDPK1                  | 85  | 7  | 0  | 4     | 2     | 1    | 0    | ---                 | 27                              | Vivek et al. 2013             |
| cluster708         | SNRK2.6                | 180 | 2  | 0  | 2     | 0     | 0    | 0    | 27,39               | 0,27,39,50                      | Yoshida et al. 2006           |
| cluster7152        | ERF2                   | 84  | 0  | 0  | 0     | 0     | 0    | 0    | 17,27               | 17,27                           | Manavella et al. 2006         |
| <b>cluster721</b>  | <b>PP2C37 (PP2CA)</b>  | 179 | 11 | 0  | 6     | 1     | 2    | 0    | 13,17,19,35         | 6,13,17,19,27,35                | Mishra et al. 2006            |
| cluster7414        | ERF5                   | 86  | 9  | 0  | 1     | 2     | 3    | 0    | 17,27,30            | 17,19,27,30                     | Pan et al. 2012               |
| cluster8059        | WIN1 (SHN1)            | 79  | 4  | 0  | 0     | 0     | 0    | 1    | 17,27               | 0,17,27                         | Sajeevan et al. 2017          |
| cluster837         | CRPK1                  | 177 | 5  | 0  | 3     | 2     | 0    | 0    | 13,20,27            | 0,13,20,27,35                   | Liu et al. 2017               |
| cluster910         | HSP70                  | 221 | 10 | 2  | 2     | 0     | 2    | 0    | 0,27,35             | 0,17,27,35                      | Kiang and Tsokos 1998         |

960 NOTE.—TN: tip number; TS: Total lineages under positive selection; Number of lineages under positive selection within M7:  
 961 Mulloginaceae; Cac35: Cactaceae; Did27: Didiereoideae; Mont: Montiaceae; Port: Portulacaceae. SH80: Duplication nodes with SH-like  
 962 support > 80, No support constraint: Duplication nodes with no constraint on support. Node number can be referred to in Fig. 1.

## Figure Legends

Fig. 1. Species tree from RAxML analysis of the 841-gene supermatrix. Gene duplication numbers (number > 12 are shown) are calculated only for branches with strong support (SH-like > 80) in the 8332 rooted clusters. Some Gene Ontology terms overrepresented in clades Cactaceae, Didiereaceae and Montiaceae are shown with significant level as  $p < 0.05$  after Bonferroni correction.

Fig. 2. A: conflict results generated by phyparts. B: Comparison of  $\ln L$  for each individual gene (sorted by greatest differences in likelihood) for alternative phylogenetic hypotheses. Top: Three alternative resolutions were compared involving Cactaceae (Cac), Portulacaceae (Port), and Anacampserotaceae (Ana). Values above the x-axis show the difference in likelihood for those genes supported the resolution found in our result “con1”. Those falling below the axis support “con2” (black) or “con3” (gray). Middle: Two alternative hypotheses involving Basellaceae (Base) and Didiereaceae (Didi). Lower: Two alternative hypotheses involving the early diverging Cactaceae (*Per*: *Pereskia*, *Leu*: *Leuenbergeria*). Outlying genes (those genes with extremely high support) are discussed in the Results and Discussion.

Fig. 3. Gene duplication and lineage positive selection patterns on a collapsed species tree from the 29 targeted genes (table 2). The number of sampling taxa in each major clade are labeled after clade name.

WGD indicated by Ks plot

Ks show peak between 0.05-0.10

1118

Number of gene duplications

Clade supports < 100% labeled

19/47

Concatenated ML/coalescent MQSST

\* : 100% support

34

Major node number

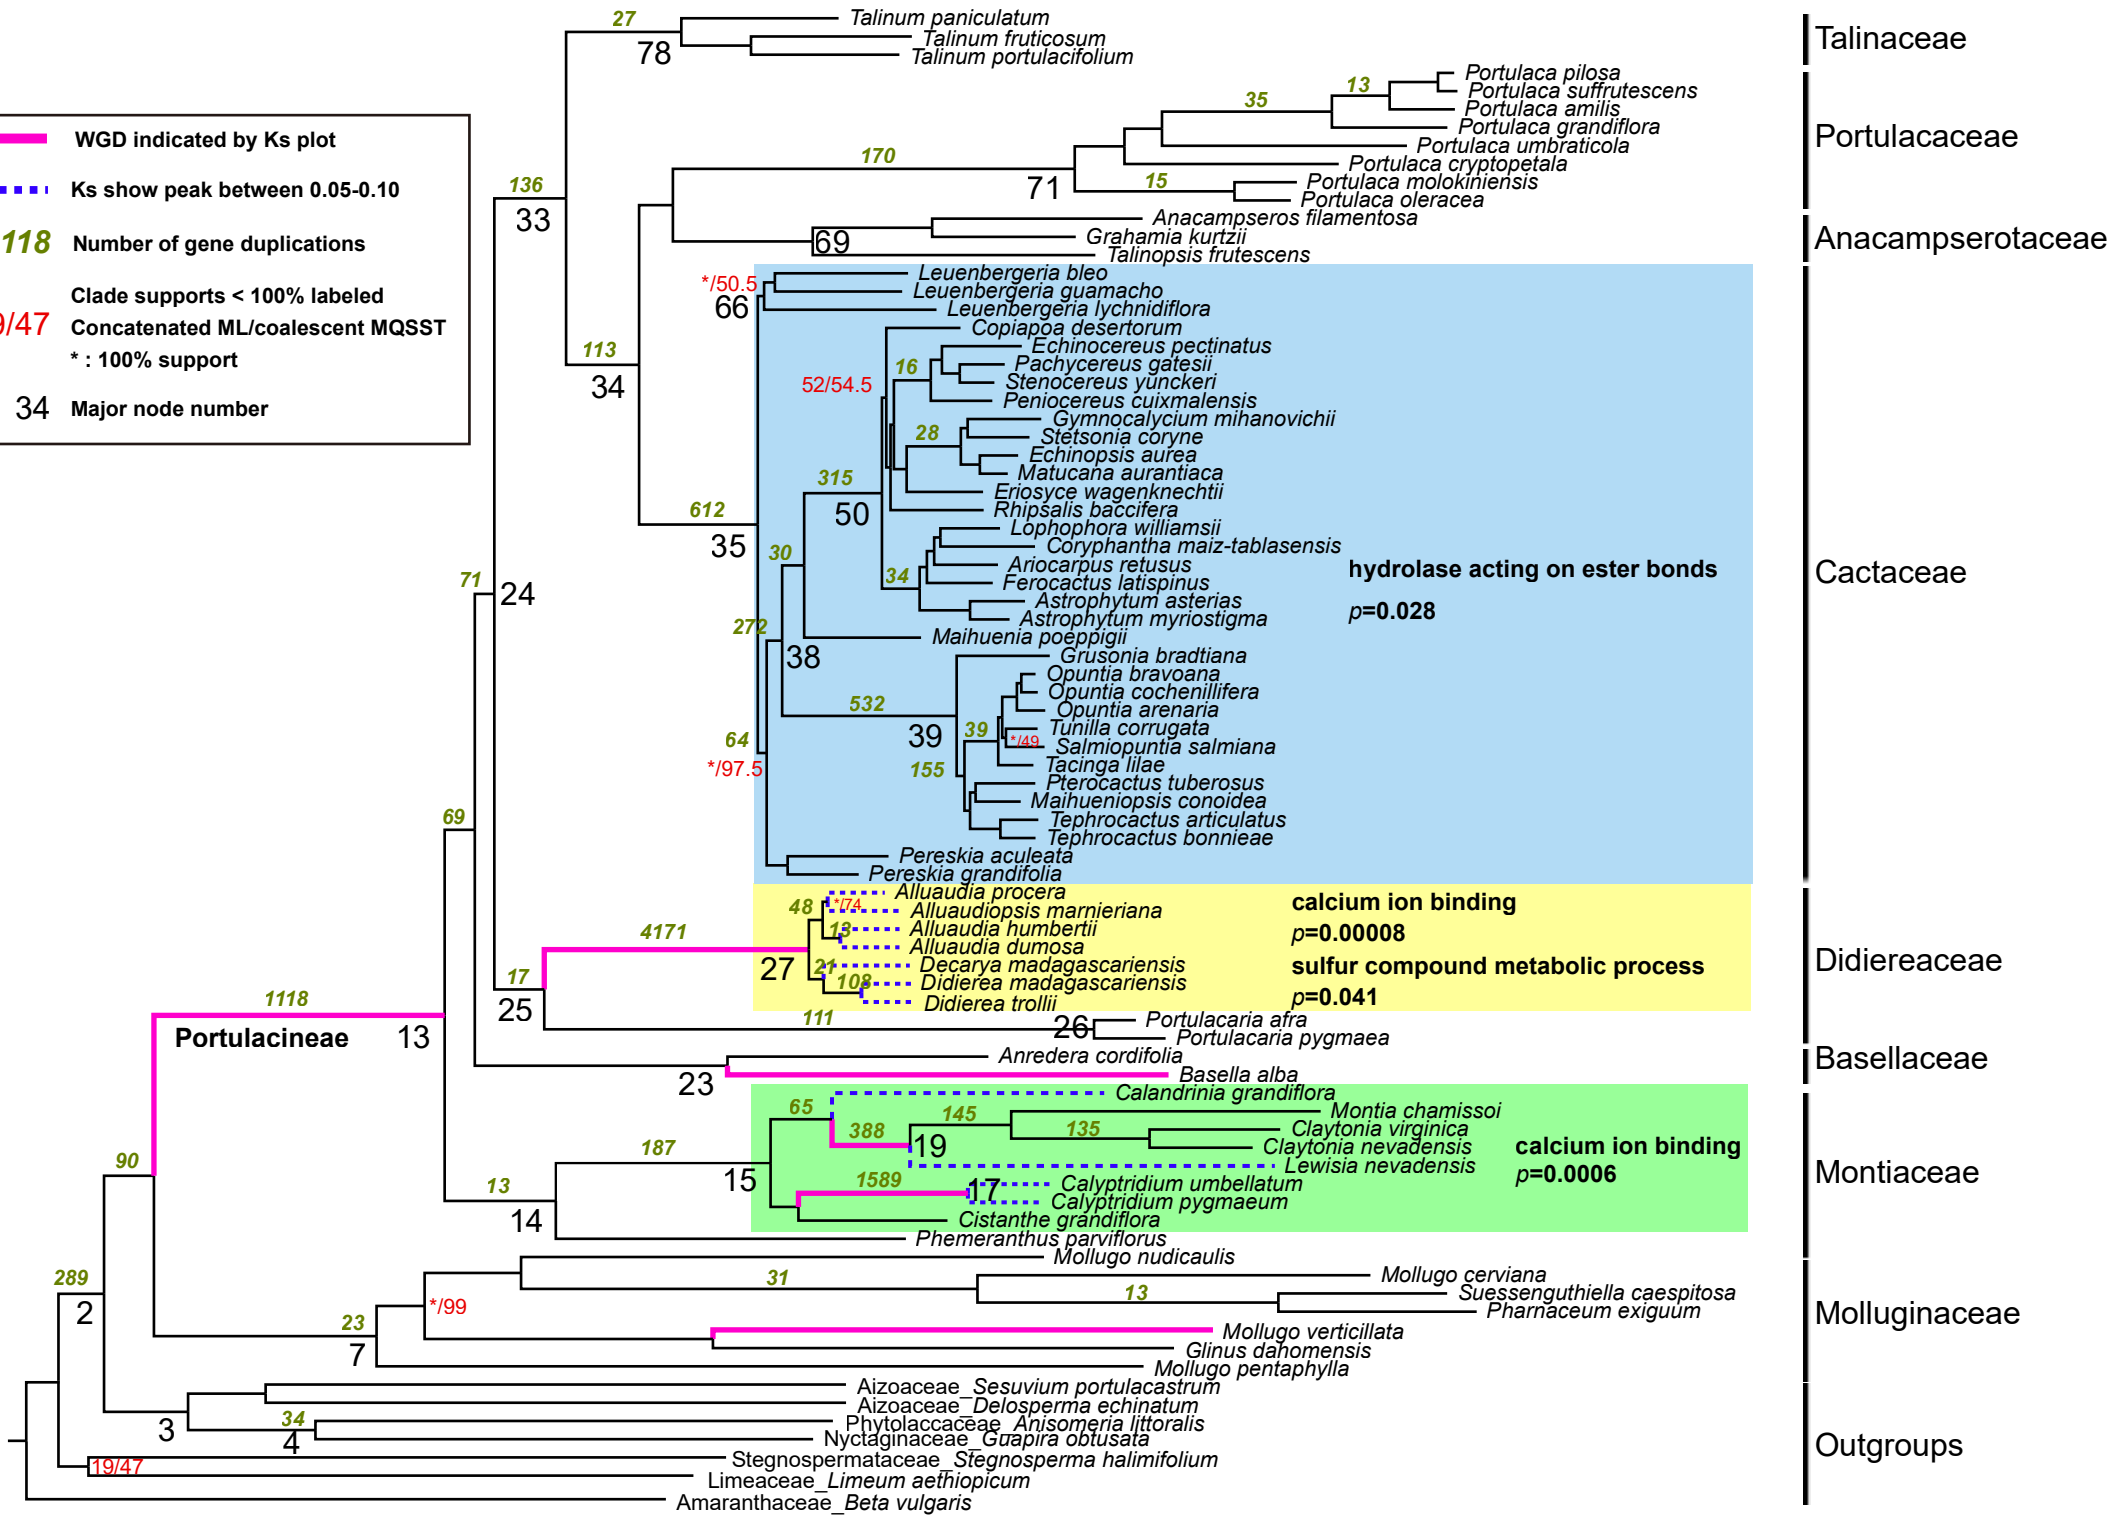

0.04

A

Number below line: concordant genes  
Number above line: conflict genes

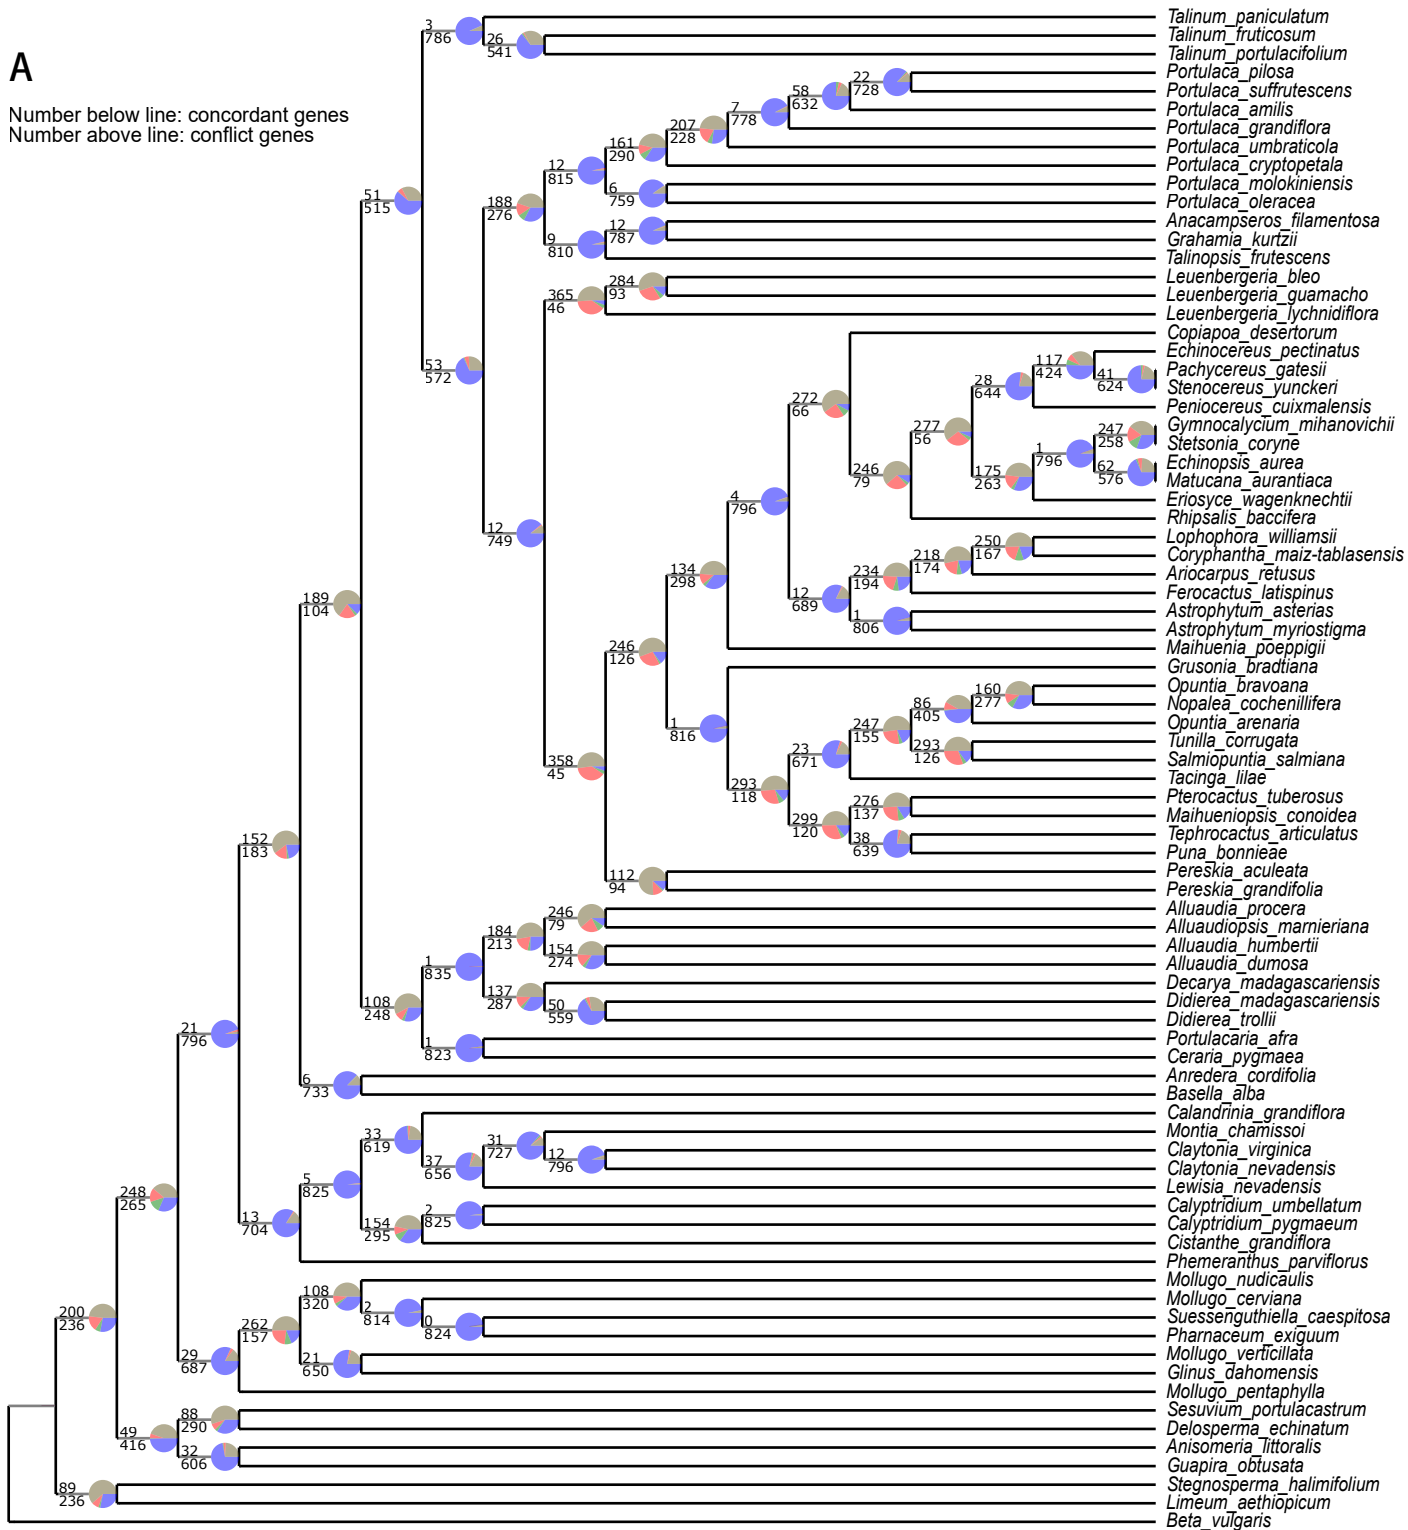

B

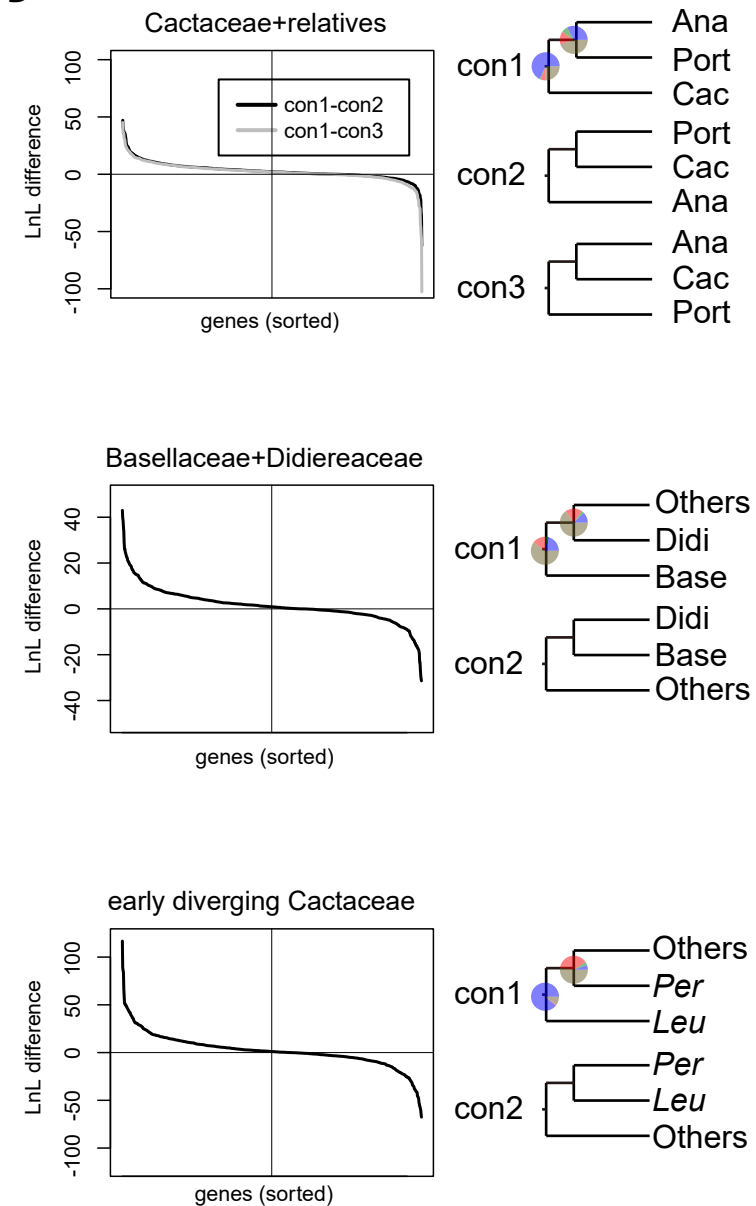

Pie chart percentage:  
Blue: concordant genes  
Green: genes with the dominant conflict topology  
Red: genes with other conflict topologies  
Grey: genes with lower supported conflict topologies

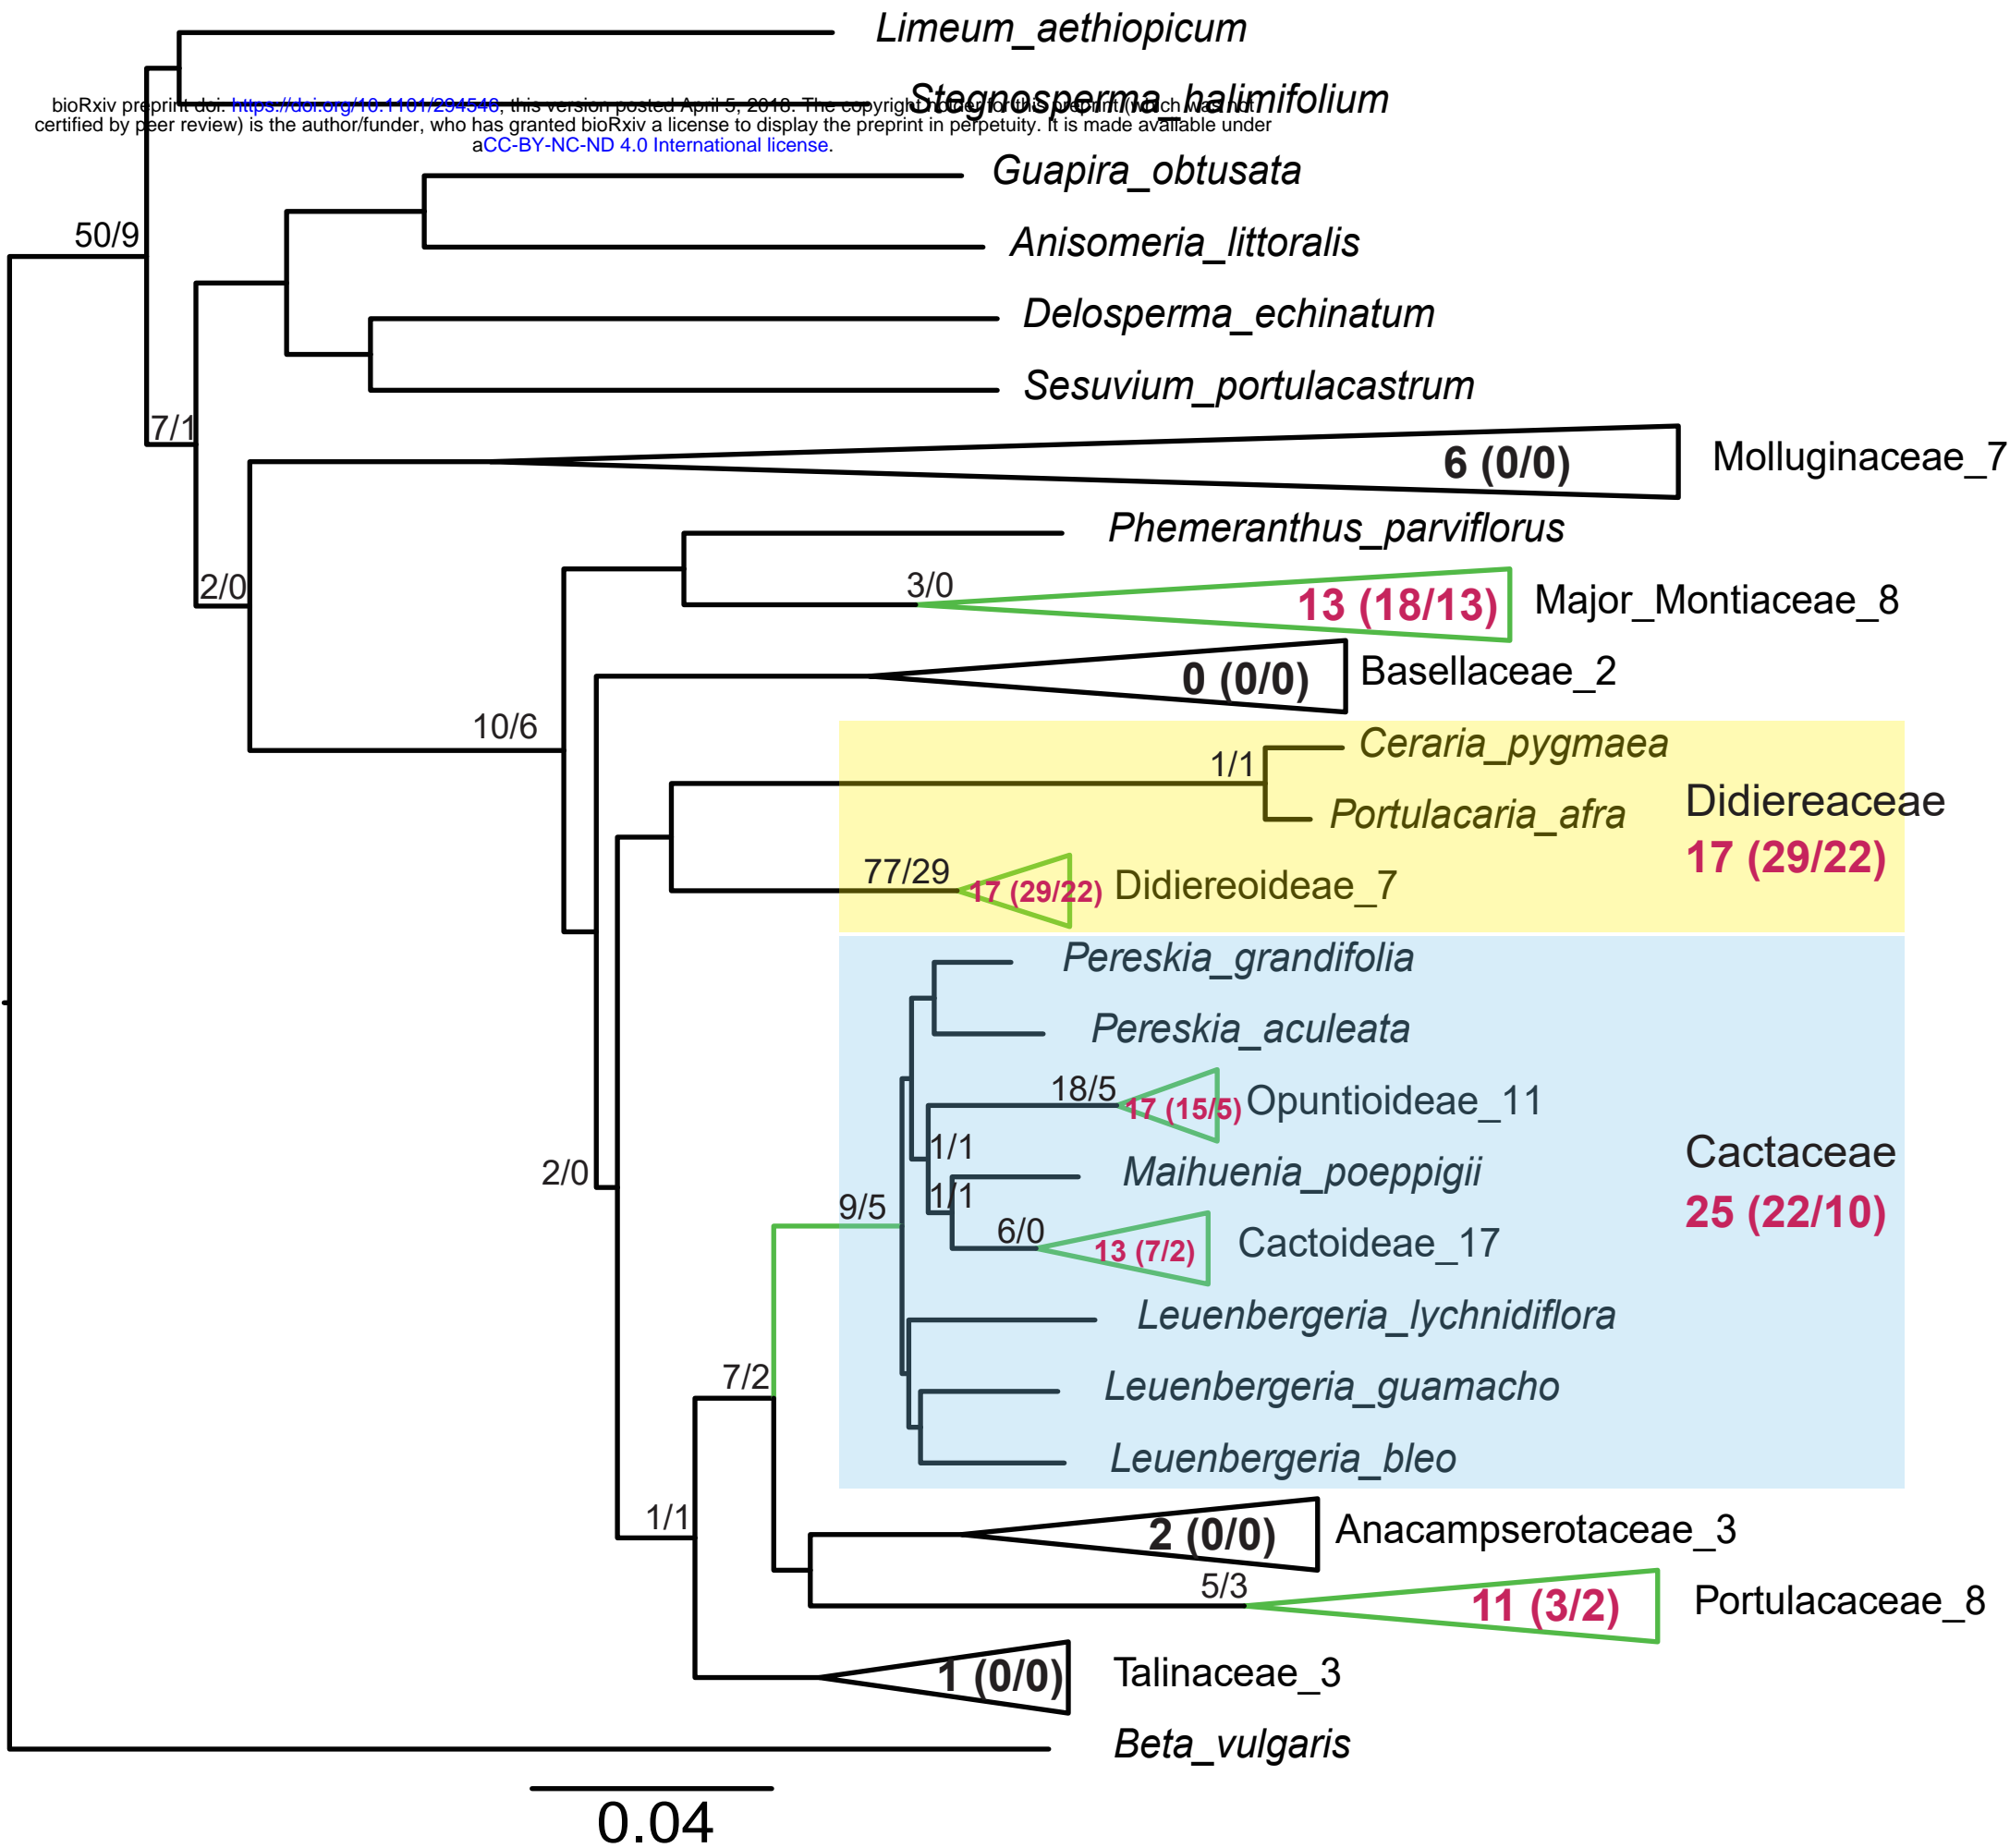

Above branches:  
Total number of duplications for that node from 29 genes, SH>0/SH>80, resulting from Phyparts analyses  
21 (27/18):  
Number of Genes that: have positive selection (have duplications SH>0/SH>80) within the whole clade
